# Supplementary material for: Transposable element-mediated rearrangements are prevalent in human genomes
Source: PubMed Central journal article supplement (PMC9675761; doi:10.1038/s41467-022-34810-8), 2022-11-19
Supplement: 41467_2022_34810_MOESM1_ESM.pdf [file 41467_2022_34810_MOESM1_ESM.pdf]

## SUPPLEMENTARY INFORMATION

### **Transposable element-mediated rearrangements are prevalent in human genomes**

Parithi Balachandran<sup>1</sup>, Isha A. Walawalkar<sup>1</sup>, Jacob I. Flores<sup>1</sup>, Jacob N. Dayton<sup>1</sup>, Peter A. Audano<sup>1</sup> & Christine R. Beck<sup>1,2,3\*</sup>

<sup>1</sup>The Jackson Laboratory for Genomic Medicine, Farmington CT 06032.

<sup>2</sup>Department of Genetics and Genome Sciences, University of Connecticut Health Center, Farmington, CT 06030.

<sup>3</sup>Institute for Systems Genomics, University of Connecticut, Storrs, CT 06269.

\*email: [christine.beck@jax.org](mailto:christine.beck@jax.org)

## TABLE OF CONTENTS

### ◆ Figures

- Supplementary Fig. 1. Different approaches used for merging and filtering SVs using SRS and LRS data.
- Supplementary Fig. 2. Size distribution of 493 TEMRs identified from three samples.
- Supplementary Fig. 3. Summary of SV length among TEMRs and non-TEMRs.
- Supplementary Fig. 4. Different recombination patterns between the two Alu elements from TEMR-HR.
- Supplementary Fig. 5. Inversions with complexities at the junctions.
- Supplementary Fig. 6. Inversion with complexities at the junctions.
- Supplementary Fig. 7. Complex rearrangement (mCNV) mediated by TEs.
- Supplementary Fig. 8. Complex rearrangements (mCNVs) mediated by TEs.
- Supplementary Fig. 9. List of four mCNVs identified in this study.
- Supplementary Fig. 10. TEMR comparison between human and chimpanzee.
- Supplementary Fig. 11. Ideogram displaying 96 LINE-1 TEMRs.
- Supplementary Fig. 12. Example of a single *Alu* element involved in two separate rearrangements.
- Supplementary Fig. 13. Downsampling analysis using short-read HTS.
- Supplementary Fig. 14. Pipeline for identifying non-redundant high-confident SVs using short-read and long-read HTS data.
- Supplementary Fig. 15. Rank-based merging SVs.

### ◆ Tables

- Supplementary Table 1. Different type of homologous TEs involved in TEMRs.
- Supplementary Table 2. Primers used for PCR and Sanger sequencing.
- Supplementary Table 3. Assessment of breakpoint accuracy between manual reconstruction and SV callers.
- Supplementary Table 4. List of 36 *Alu* and 54 LINE-1 elements involved in 493 TEMRs.
- Supplementary Table 5. Count of *Alu* and LINE-1 subfamilies involved in 493 TEMRs.
- Supplementary Table 6. Median percent similarity between different TEs, SV types, and mechanisms.
- Supplementary Table 7. Summary of the correlation analysis.
- Supplementary Table 8. Total count of Exonic, intronic and proximal SVs.
- Supplementary Table 9. Tools and packages.
- Supplementary Table 10. Restriction enzymes, primers and probes used for ddPCR.

### ◆ Supplementary References

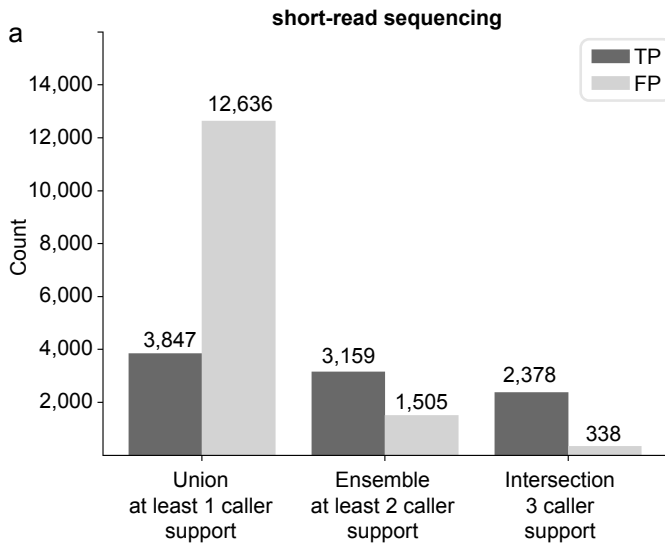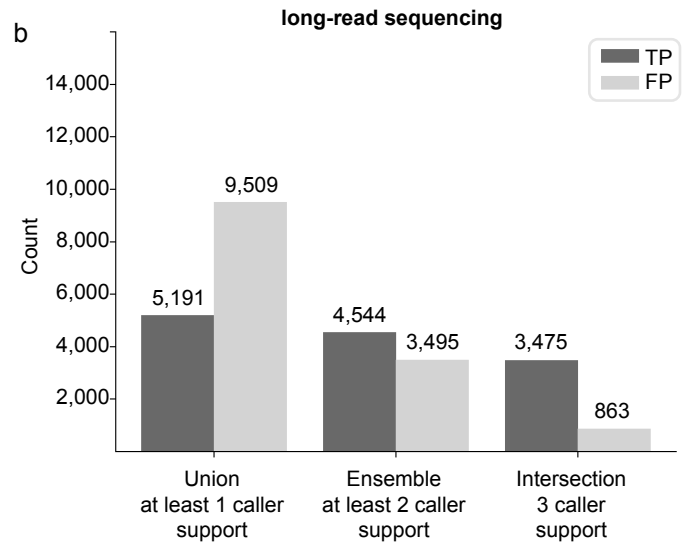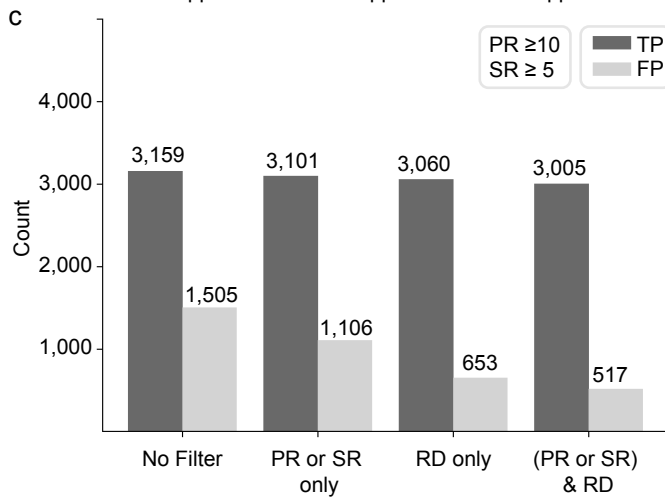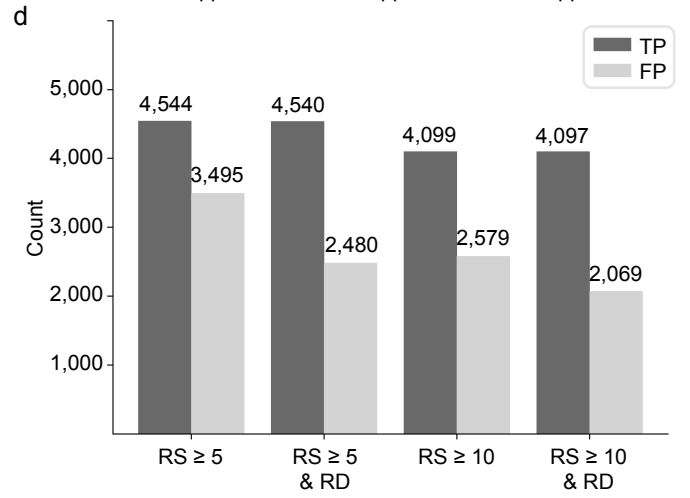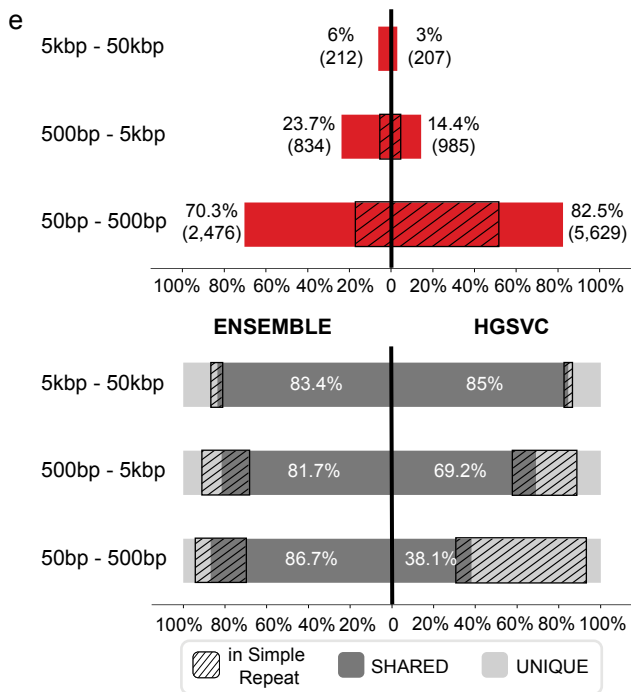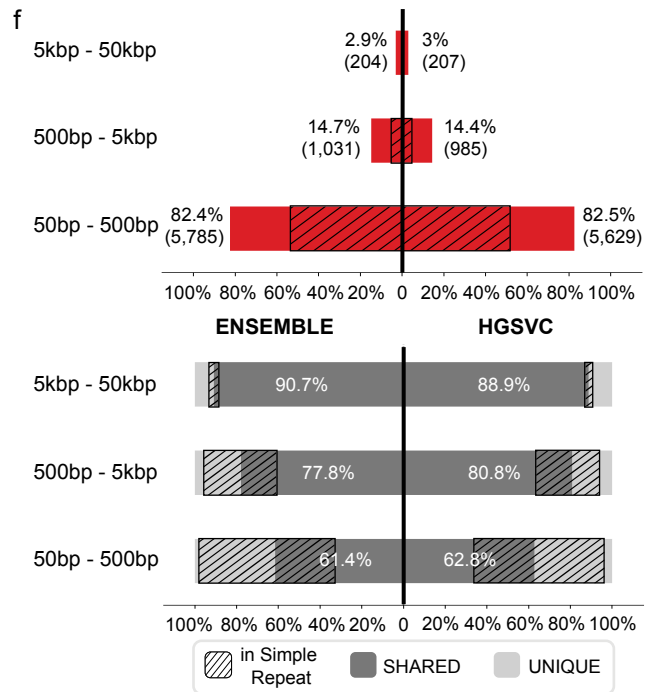

**Supplementary Fig. 1. Different approaches used for merging and filtering SVs using SRS (a, c, and e) and LRS (b, d, and f) data. a & b** Merging data from multiple callers. Average true positive SVs (TP: dark gray) compared to the average false positive SVs (FP: light gray) per sample, for methods with at least 1 (Union) or 2 (Ensemble) or 3 (Intersect) caller support for identifying an SV. **c & d** Different parameters (paired-read: PR, split-read: SR, read-depth: RD) used for additional filtering. Average true positive SVs (TP: dark gray) compared to the average false positive SVs (FP: light gray) per sample. **e & f** SVs overlapping (50%) simple repeat regions. Top graph indicates percentage of SVs from ensemble callset and truth set that overlaps simple repeats. Bottom graph indicates the percentage of SVs that are either unique or shared between the ensemble callset and the truth set. The shaded portion indicates the percentage of SVs that overlap (50%) simple repeats.

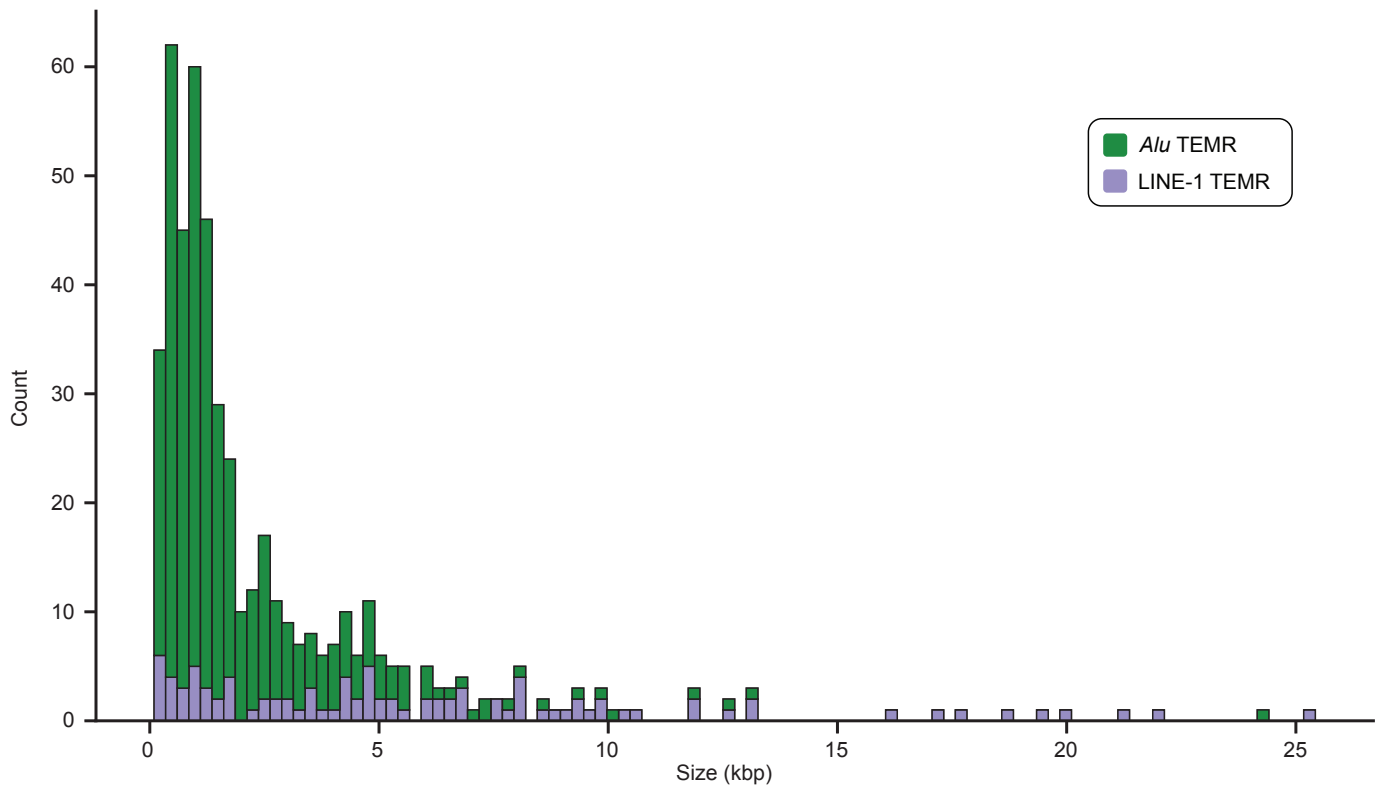

**Supplementary Fig. 2. Size distribution of 493 TEMRs identified from three samples.** Size distribution of both *Alu* TEMRs (green) and LINE-1 TEMRs (purple) identified in this study.

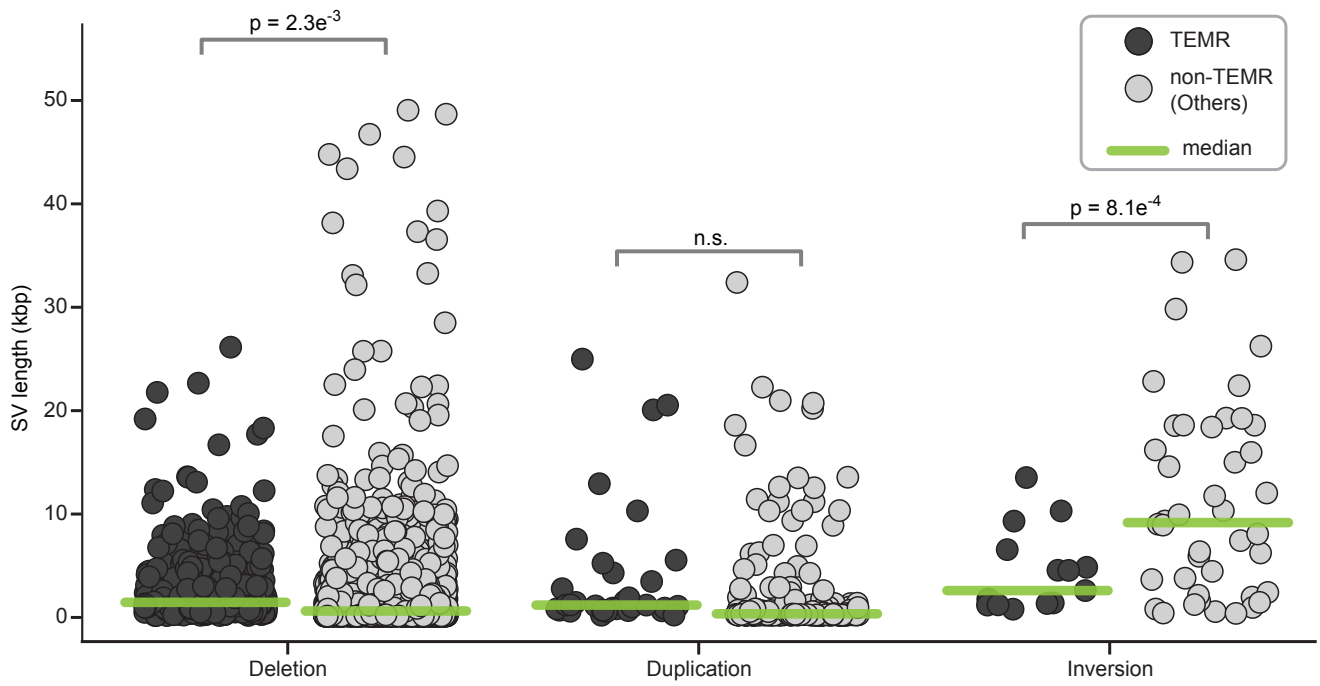

**Supplementary Fig. 3. Summary of SV length among TEMRs and non-TEMRs.** Summary of SV length among TEMRs and non-TEMRs within deletion (n=445 vs 1,981), duplication (n=33 vs 202), and inversion (n=15 vs 42). Two-sided Welch's t-test was used to calculate the p-value between the two categories.

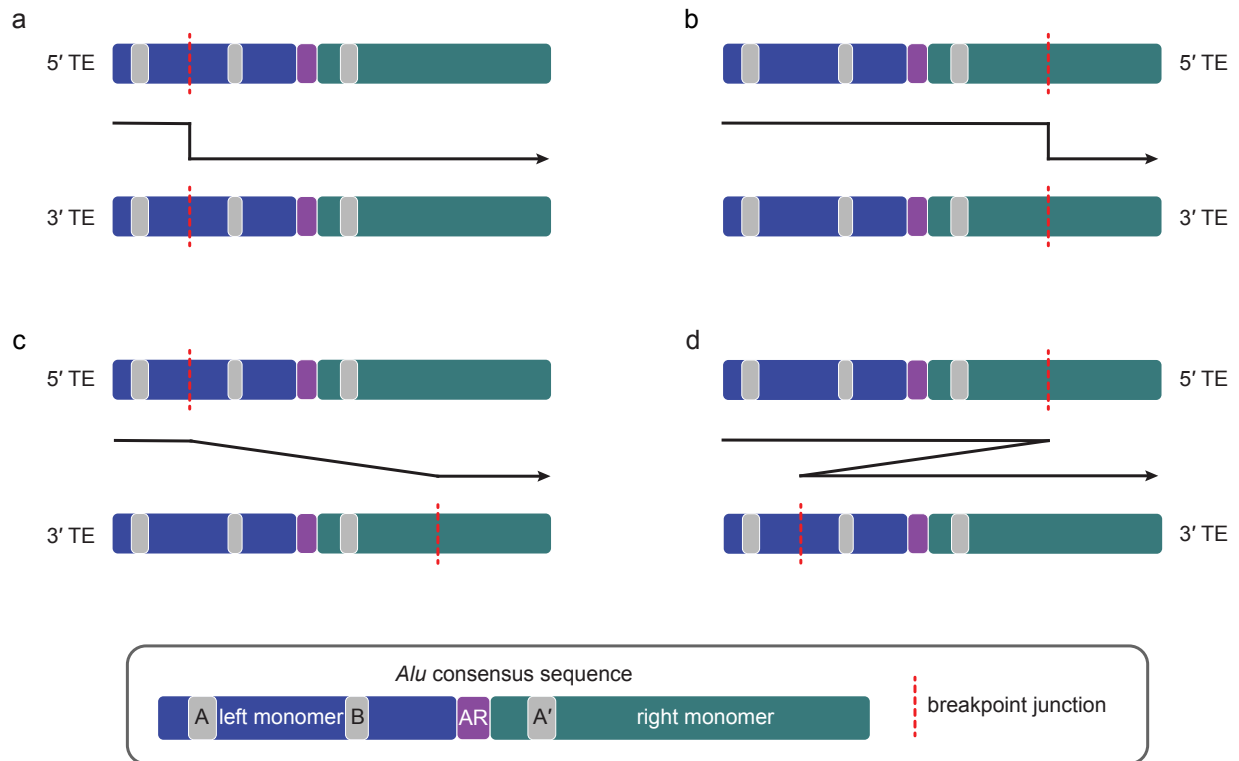

**Supplementary Fig. 4. Different recombination patterns between the two *Alu* elements from TEMR-HR.** Breakpoint junctions are present in the same monomer (a: left and b: right) of the two *Alu* elements resulting in a ~300 bp chimeric *Alu* recombination product. Breakpoint junctions are present in the opposite monomer of the two *Alu* elements, resulting in a recombination product of either ~150 bp (c) or ~450 bp (d) chimeric *Alu*.

a

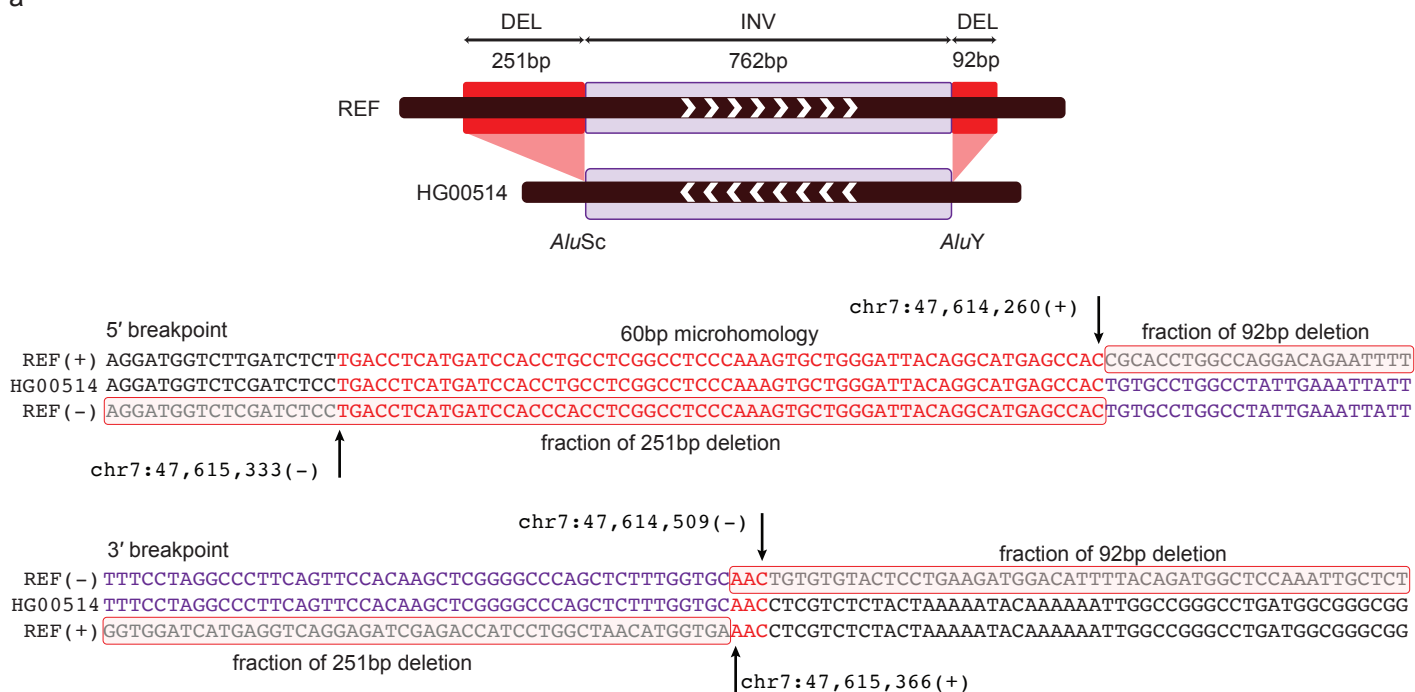

b

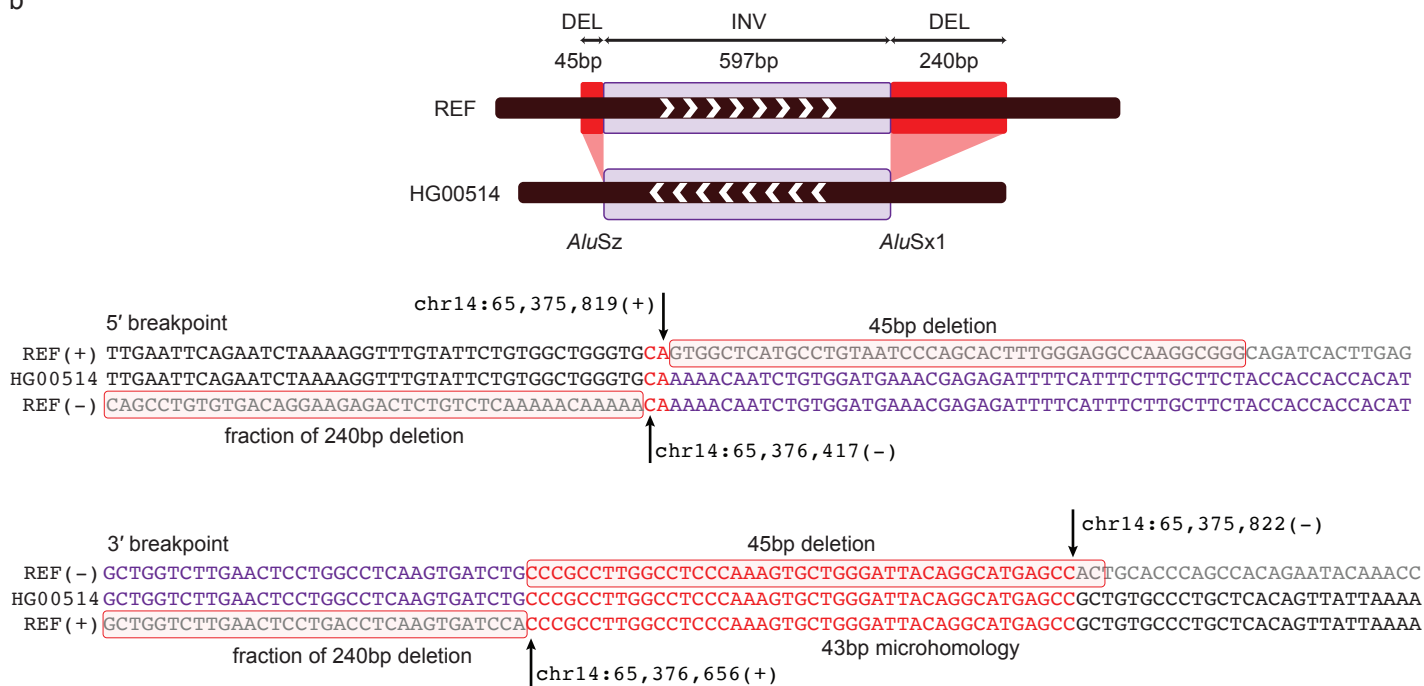

**Supplementary Fig. 5. Inversions with complexities at the junctions.** Examples of inversion with deletions near the breakpoint junctions. Top panel in a & b: schematic representing the inversion (INV, purple) with deletions (DEL, red) around the breakpoint junction. Bottom panel in a & b: junction reconstruction of the complex inversion (purple font) event with their corresponding microhomologies (red font) and deleted sequence (red box). REF, reference genome (GRCh38).



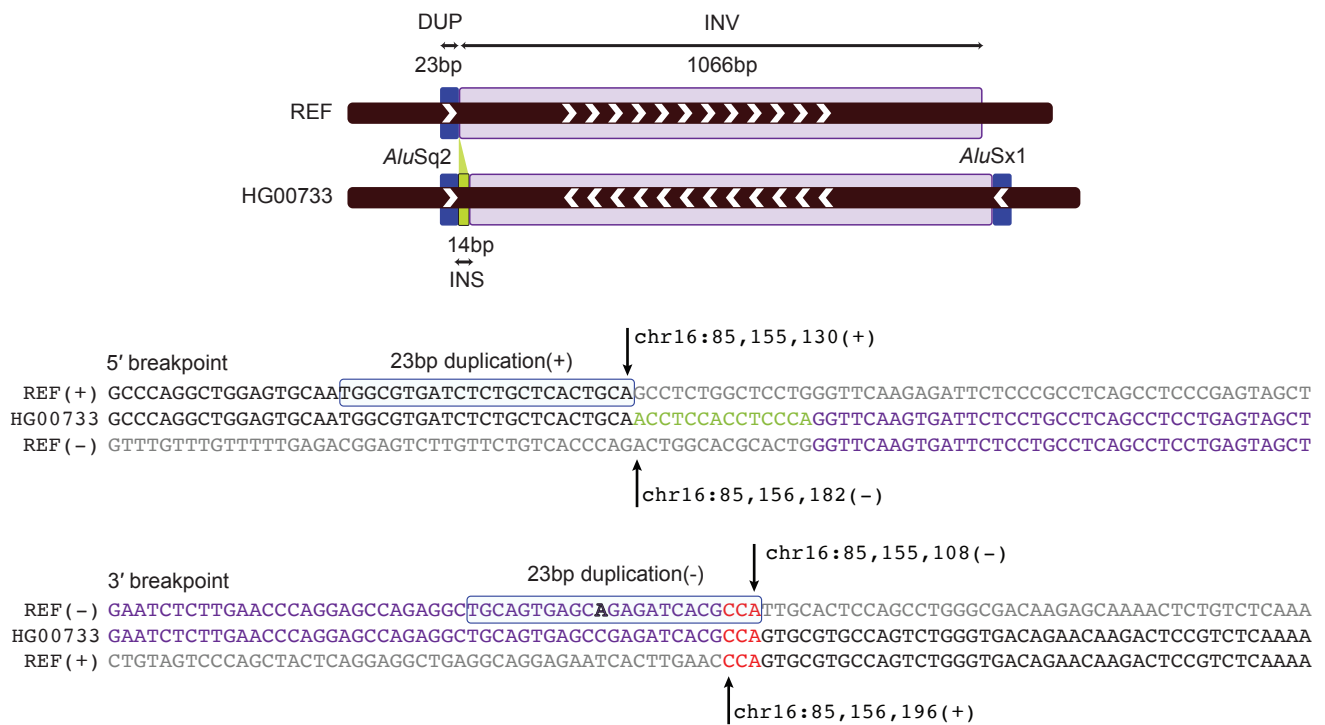

**Supplementary Fig. 6. Inversion with complexities at the junctions.** Examples of inversion with duplication and insertion near the breakpoint junctions. Top panel: schematic representing the inversion (INV, purple) with duplication (DUP, blue) and insertion (INS, green) around the breakpoint junction. Bottom panel: junction reconstruction of the complex inversion (purple font) event with the corresponding microhomologies (red font), inserted sequence (green font) and duplicated sequence (blue box). REF, reference genome (GRCh38).

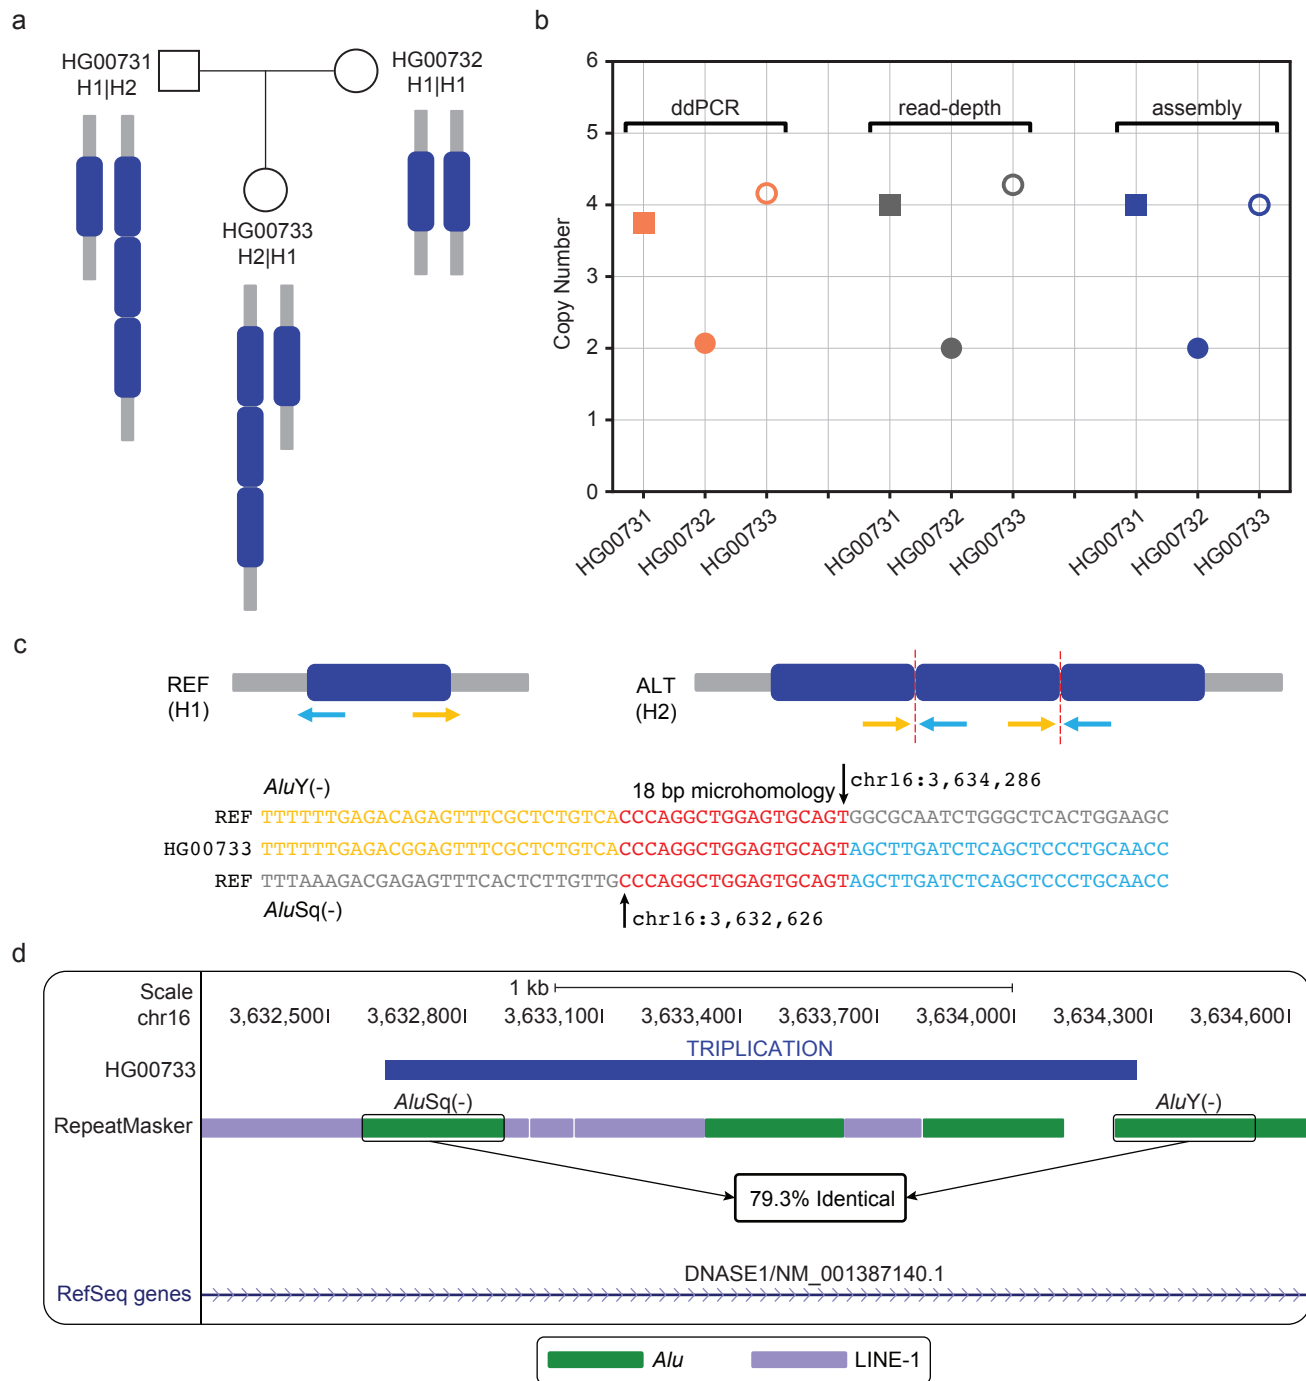

**Supplementary Fig. 7. Complex rearrangement (mCNV) mediated by TEs.** **a** Schematic representing the triplication found in the Puerto Rican trio. **b** Copy number status of the individuals containing the triplication identified using ddPCR, read-depth analysis and assembly data. **c** Breakpoint junctions indicating an 18 bp microhomology. **d** UCSC genome browser depicting the triplication between an *AluSq* and an *AluY* element within intron 1 of *DNASE1*.

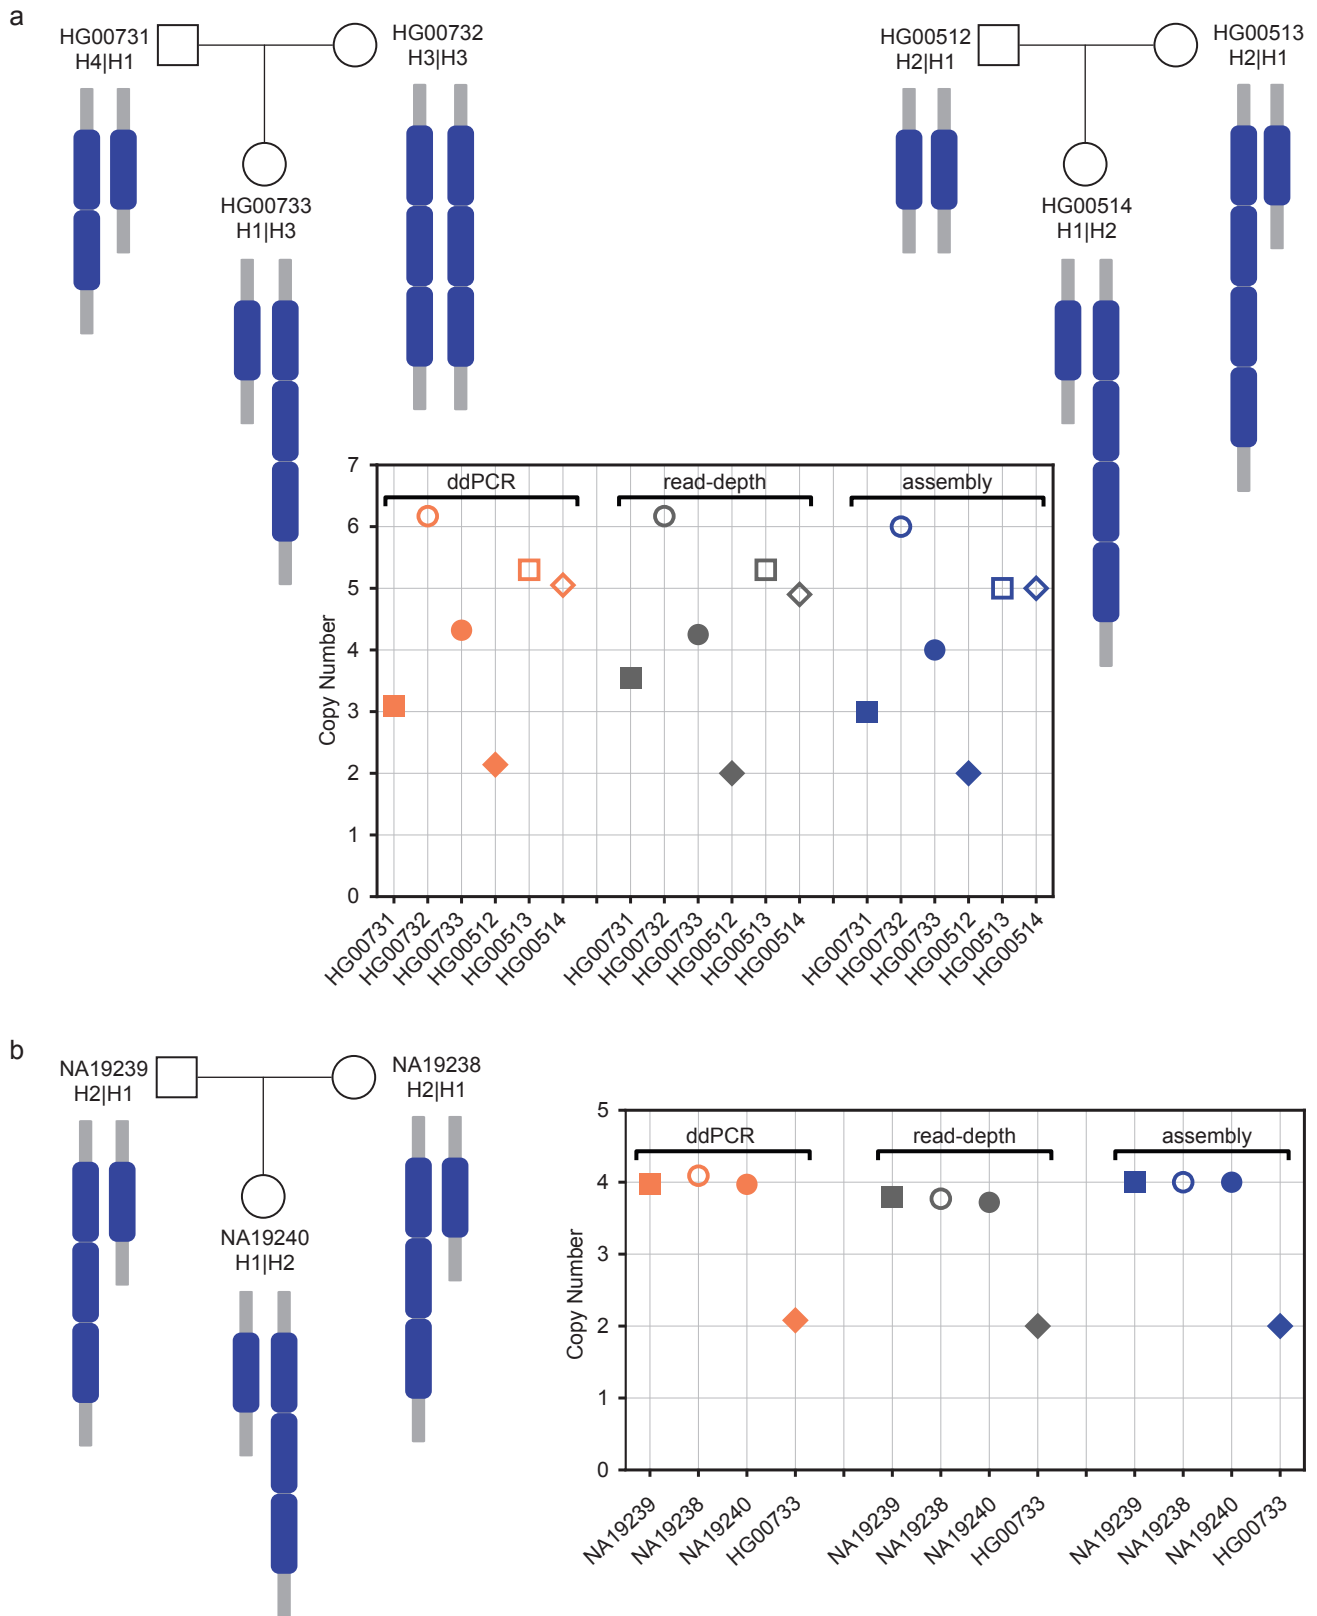

**Supplementary Fig. 8. Complex rearrangements (mCNVs) mediated by TEs.** **a** Schematic representing the triplication found in Puerto Rican family and quadruplication found in Han Chinese family. Copy number status of the individuals containing mCNV determined using ddPCR, read-depth analysis and assembly data. **b** Schematic representing the triplication found in the Yoruban Nigerian family. Copy number status of the samples containing triplication determined using ddPCR, read-depth analysis and assembly data.

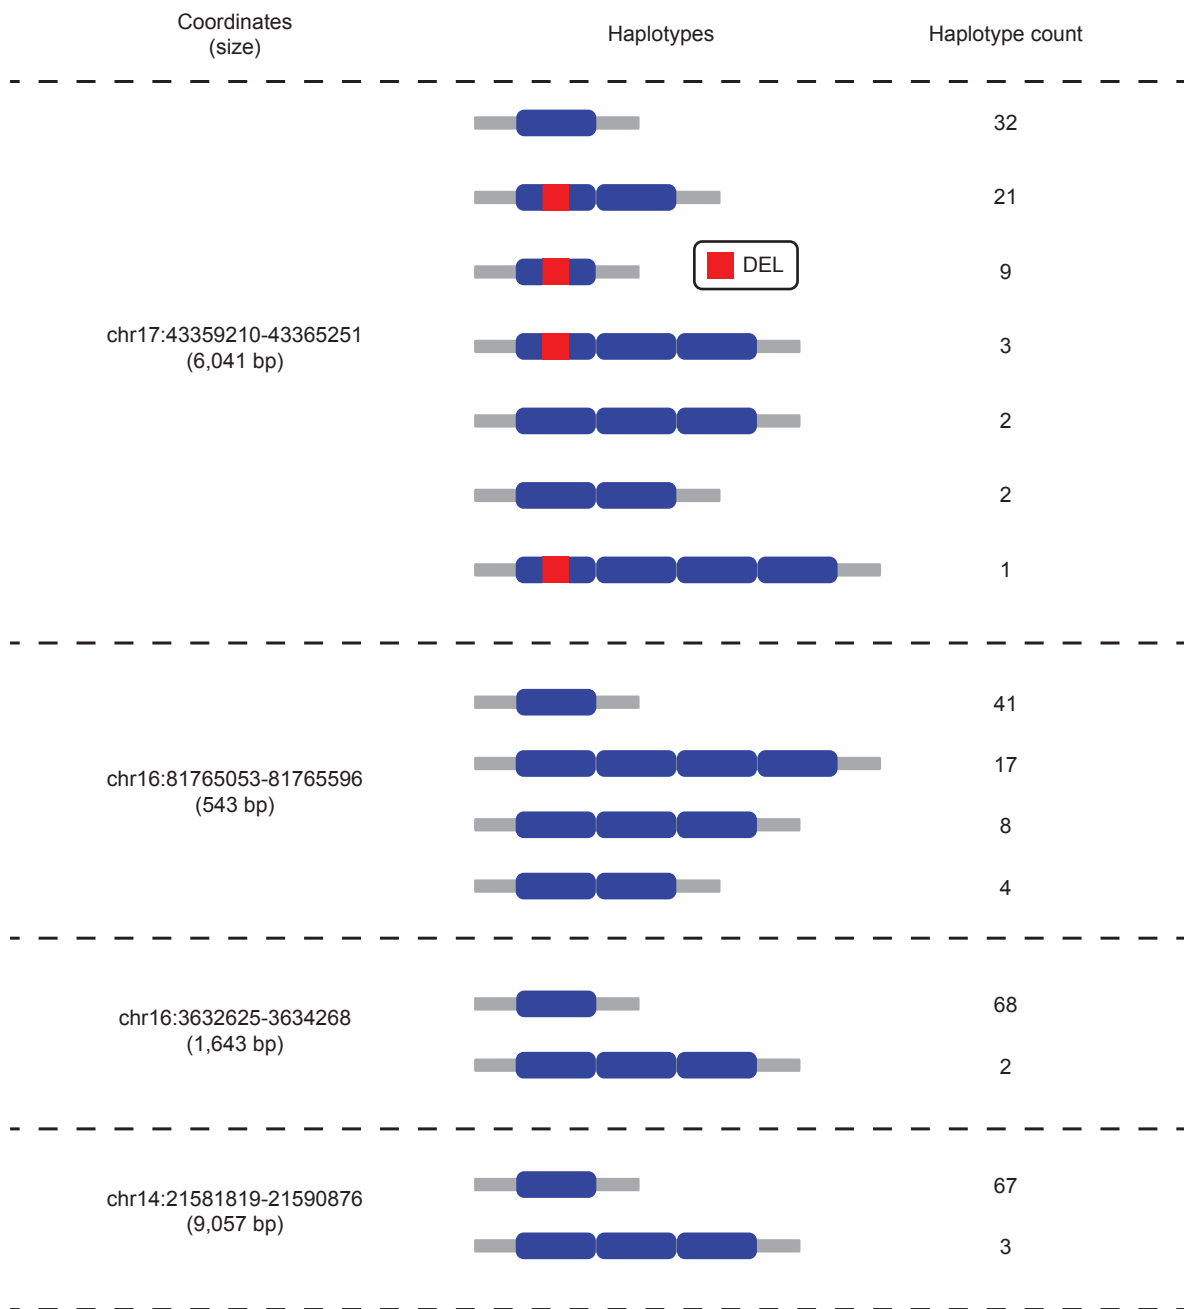

**Supplementary Fig. 9. List of four mCNVs identified in this study.** *Alu/Alu*-mediated amplifications resulting in multiple haplotypes within diverse human population.

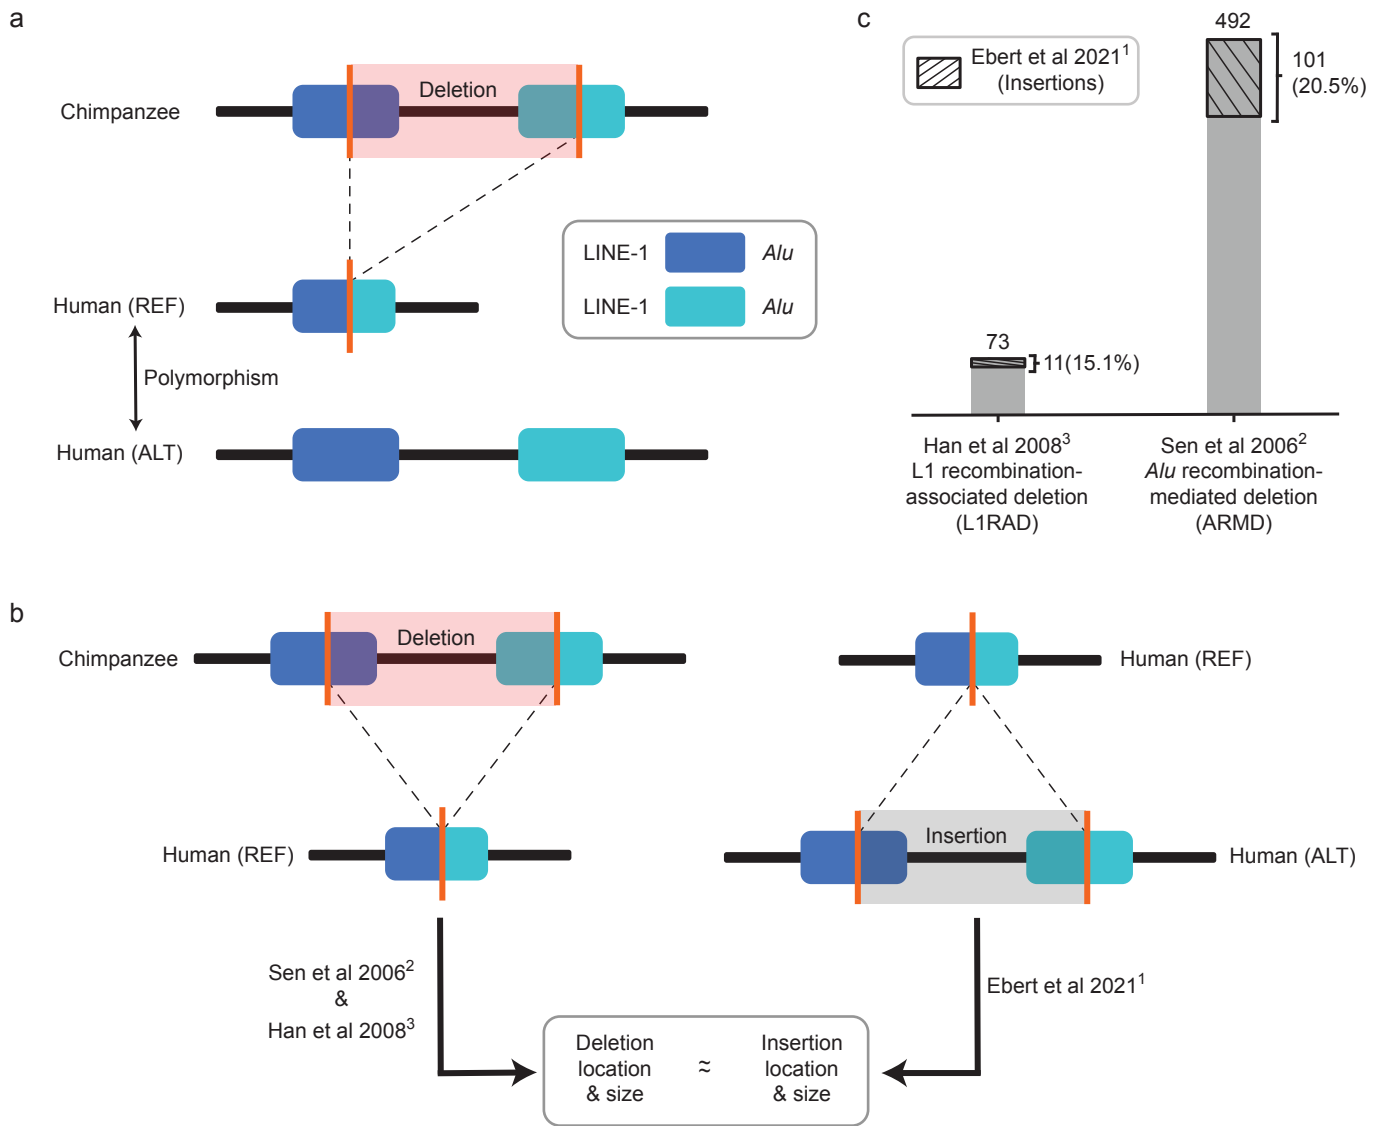

**Supplementary Fig. 10. TEMR comparison between human and chimpanzee.** **a** Schematic representing polymorphic TEMRs between human and chimpanzee genomes. **b** Schematic representing the method used to compare outputs between studies. **c** Comparing results between studies and identifying the percentage of TEMRs that are polymorphic within humans. REF, reference genome (GRCh38).

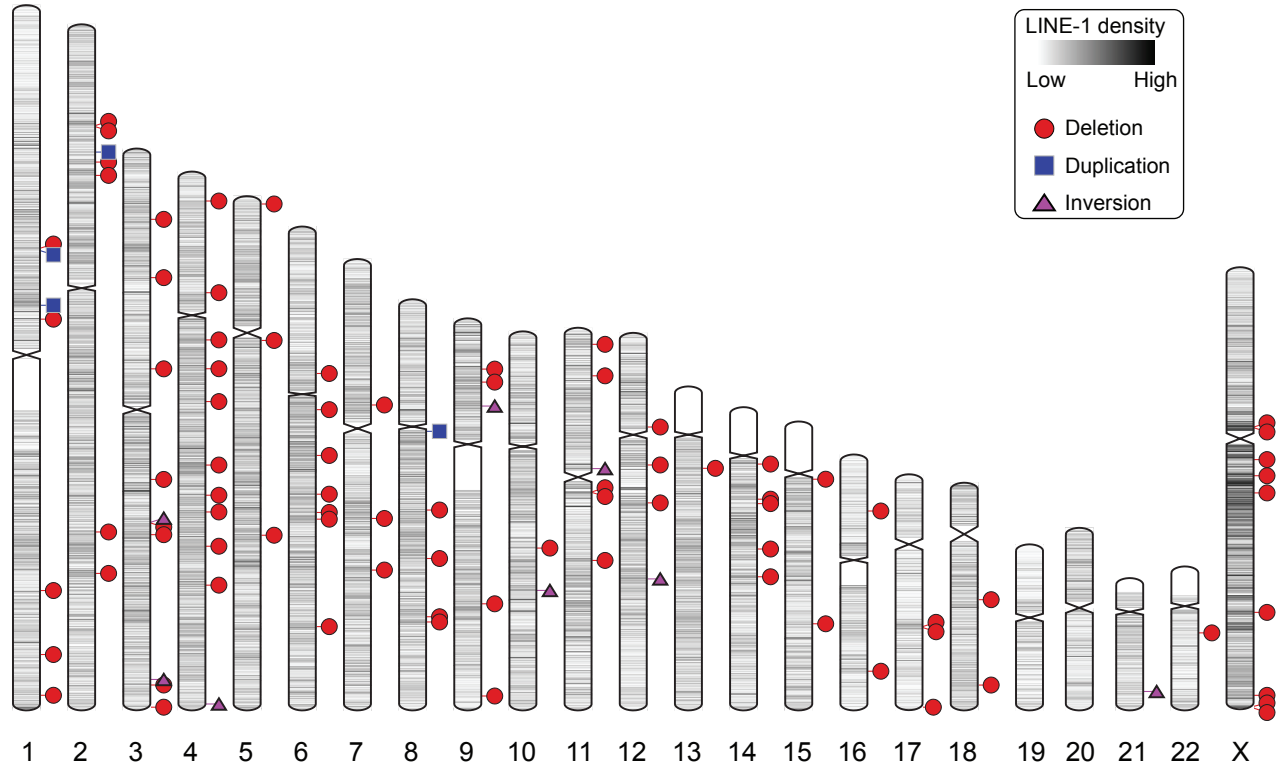

**Supplementary Fig. 11. Ideogram displaying 96 LINE-1 TEMRs.** The shapes represent the variant type (shape) and the shading represent the LINE-1 density.

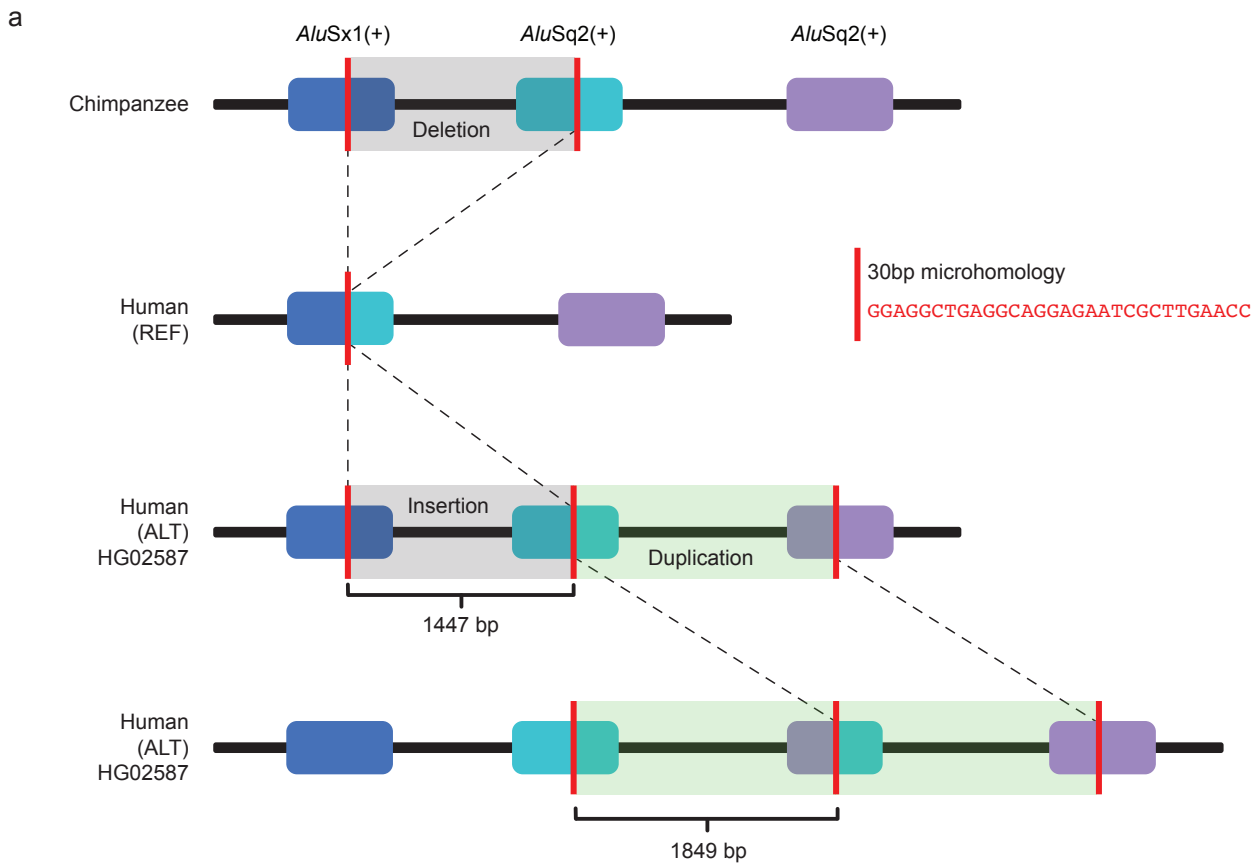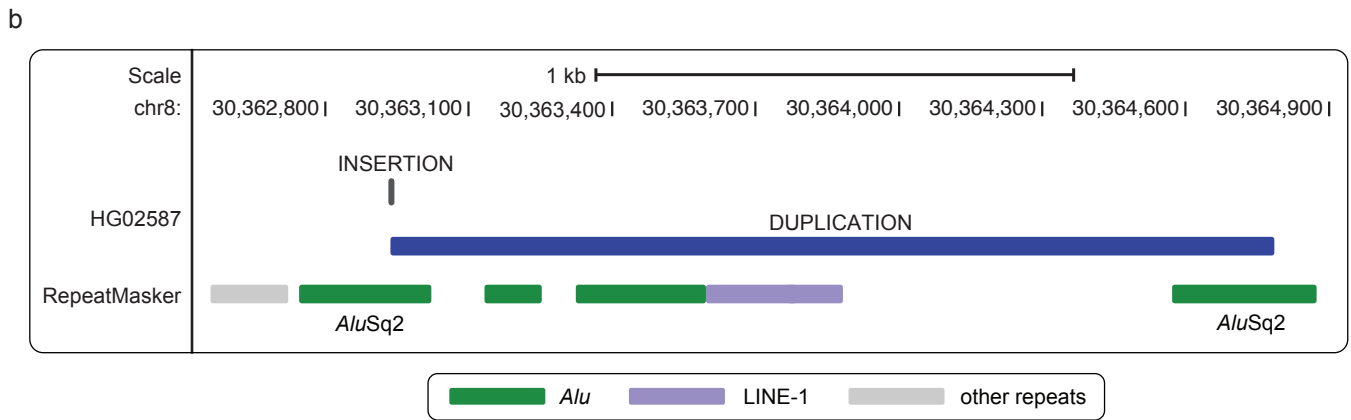

**Supplementary Fig. 12. Example of a single *Alu* element involved in two separate rearrangements. a** Polymorphic deletion between an *AluSx1*(blue) and an *AluSq2*(cyan) and a duplication between an *AluSq2* (cyan) and an *AluSq2* (purple) in HG02587. **b** UCSC genome browser depicting the insertion within an *AluSq2* and duplication between an *AluSq2* and an *AluSq2*.

TEMRs at 75x coverage

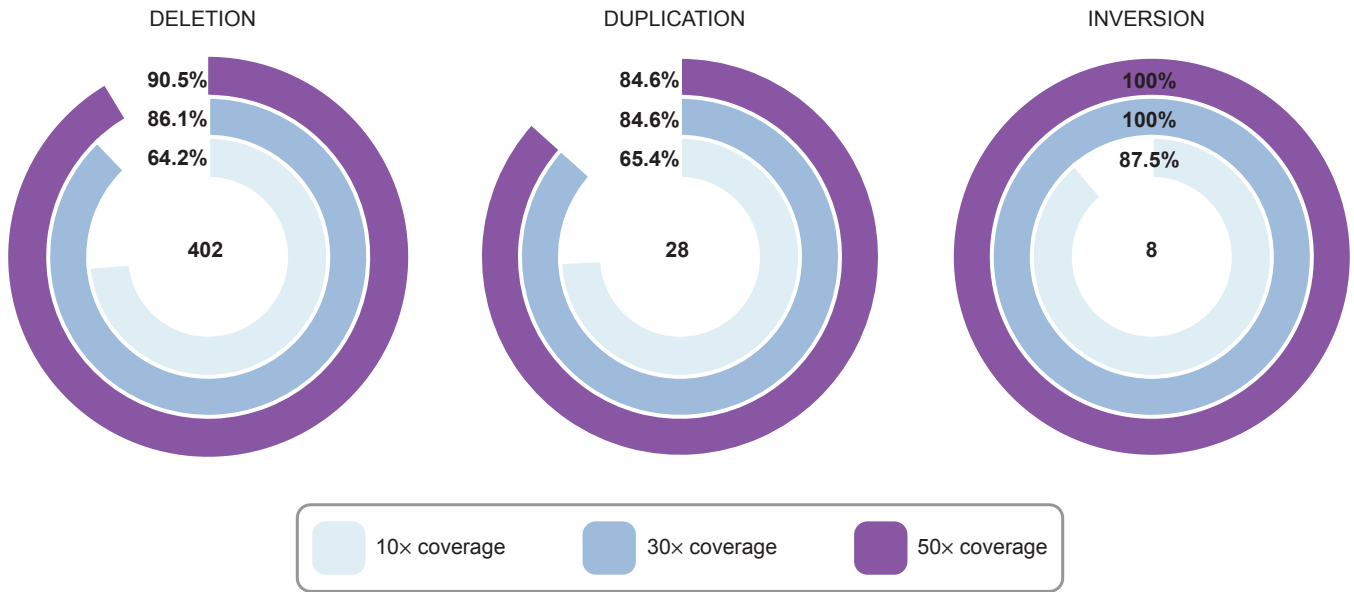

**Supplementary Fig. 13. Downsampling analysis using short-read sequencing (SRS).** Percentage of TEMRs identified using lower coverage (downsampled to 50x, 30x and 10x) SRS data compared to original (75x: 402 deletions, 28 duplications, and 8 inversions) SRS data used in this study.



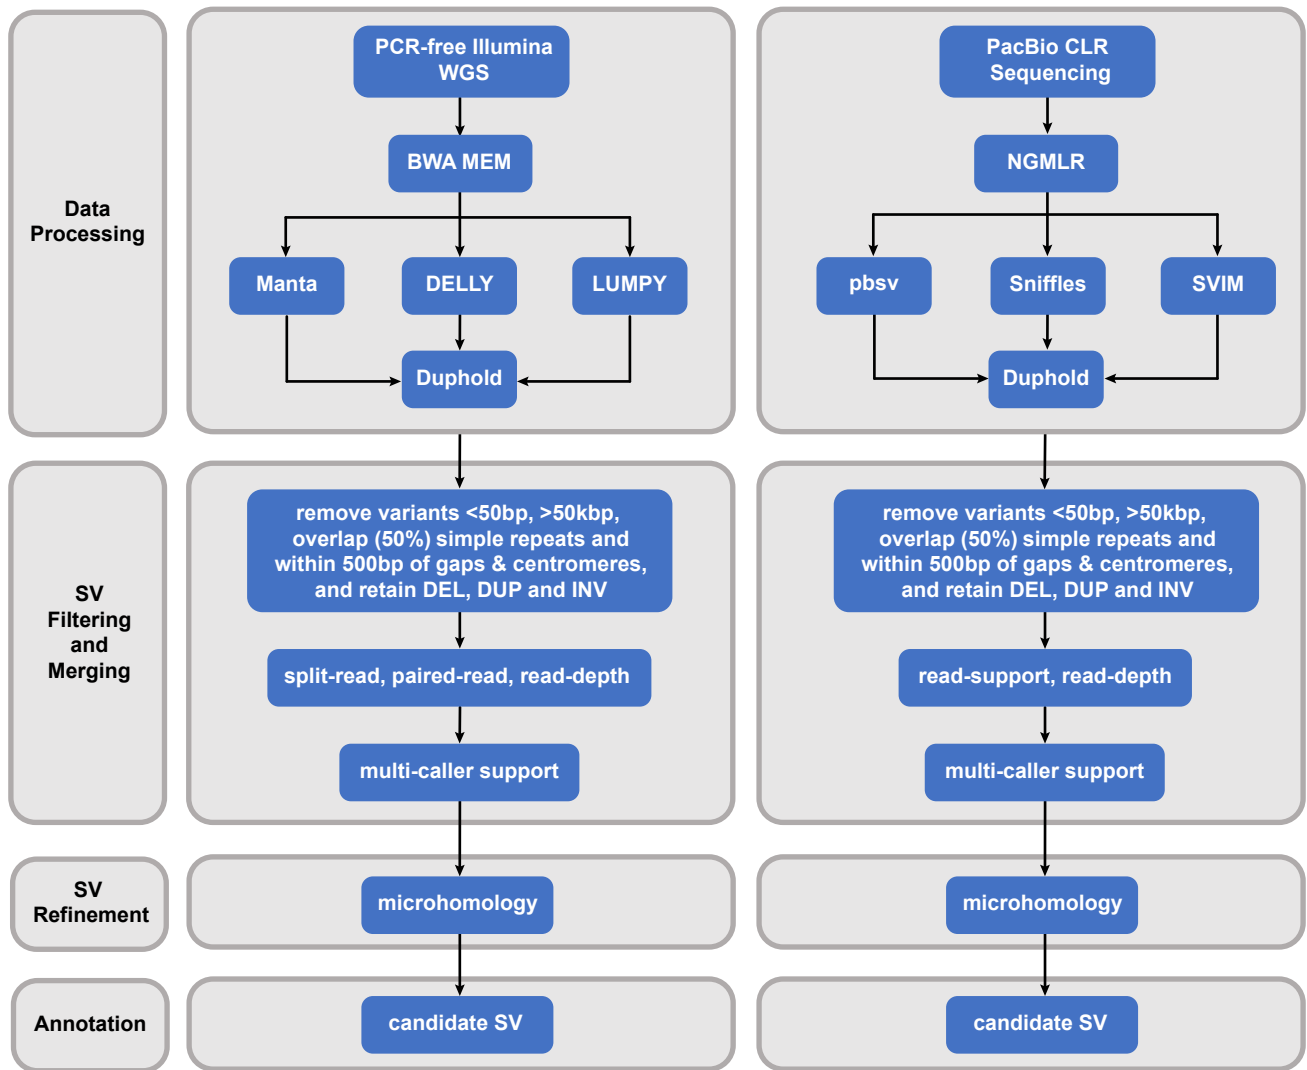

**Supplementary Fig. 14. Pipeline for identifying non-redundant high-confident SVs using short-read sequencing and long-read sequencing data.**

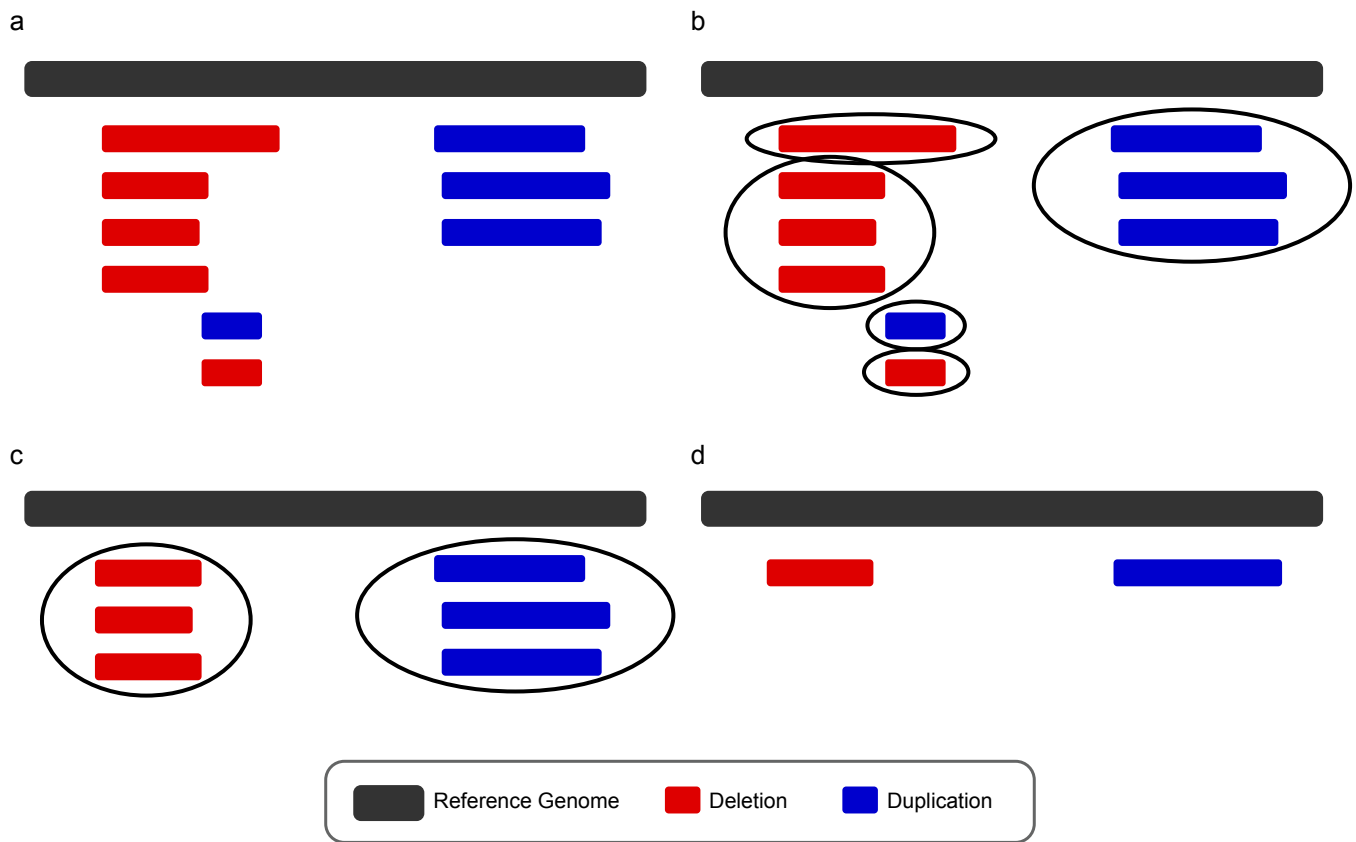

**Supplementary Fig. 15. Rank-based merging SVs.** **a** SVs are sorted based on coordinates. **b** SVs are clustered by 80% reciprocal overlap and type. **c** Clusters without SVs from at least 2 callers are removed. **d** SV with the highest rank within each cluster is retained and the rest are removed, resulting in one SV per cluster.

| TE type       | count      | percentage | size in bp (min) | size in bp (median) | size in bp (max) |
|---------------|------------|------------|------------------|---------------------|------------------|
| <i>Alu</i>    | <b>397</b> | 73.1       | 94               | 1163                | 24298            |
| <b>L1</b>     | <b>96</b>  | 17.7       | 93               | 4469                | 25423            |
| ERVL-MaLR     | 14         | 2.6        | 121              | 1320.5              | 33050            |
| ERV1          | 11         | 2          | 280              | 1831                | 35096            |
| ERVL          | 8          | 1.5        | 57               | 356                 | 2378             |
| L2            | 6          | 1.1        | 219              | 935                 | 11144            |
| ERVK          | 3          | 0.6        | 5204             | 30201               | 43110            |
| MIR           | 2          | 0.4        | 331              | 516.5               | 702              |
| SVA           | 2          | 0.4        | 3260             | 6658.5              | 10057            |
| TcMar-Mariner | 2          | 0.4        | 301              | 547                 | 793              |
| TcMar-Tigger  | 1          | 0.2        | 169              | 169                 | 169              |
| hAT-Charlie   | 1          | 0.2        | 2001             | 2001                | 2001             |
| Total         | 543        |            |                  |                     |                  |

**Supplementary Table 1. Different type of homologous TEs involved in TEMRs.**

| CHR   | POS       | END       | SV type | PCR forward primer      | PCR reverse primer      | Sanger forward primer   | Sanger reverse primer   | PCR & Sanger primer |
|-------|-----------|-----------|---------|-------------------------|-------------------------|-------------------------|-------------------------|---------------------|
| chr1  | 16424661  | 16428623  | DEL     | GGATCCTCCCATCTCAGTATCTG | CCCTTGACAGCCTCATTGT     | GGATCCTCCCATCTCAGTATCTG | CCCTTGACAGCCTCATTGT     | Same                |
| chr1  | 95076732  | 95077058  | DEL     | ATCAGCTGAGATCGGGAGTTT   | GTTACTTGGGACACTGAGGTGA  | ATCAGCTGAGATCGGGAGTTT   | GTTACTTGGGACACTGAGGTGA  | Same                |
| chr1  | 206641337 | 206642314 | DEL     | CAGGTGGTGTGGGTTACATGA   | GGATGGCTGGGTCAAATGGTATT | CAGGTGGTGTGGGTTACATGA   | GGATGGCTGGGTCAAATGGTATT | Same                |
| chr1  | 229237641 | 229238015 | DEL     | AGGGACTCTGCACATTCCGG    | GCAACCTGAAGTAACCTGATGT  | AGGGACTCTGCACATTCCGG    | GCAACCTGAAGTAACCTGATGT  | Same                |
| chr1  | 247091230 | 247091618 | DEL     | AAATGGCAGGTGTGACAAGG    | CAGCACTCTGTGAGTCTCTGTCT | AAATGGCAGGTGTGACAAGG    | CAGCACTCTGTGAGTCTCTGTCT | Same                |
| chr10 | 13675548  | 13676409  | DEL     | AATGGCAGGAAGATGGACCC    | GCCTCTAACACCTGTCCGTT    | AATGGCAGGAAGATGGACCC    | GCCTCTAACACCTGTCCGTT    | Same                |
| chr11 | 677316    | 677770    | DEL     | GTCTCCTTATGTTGCCAGG     | CCACATGCAGCCAAGATTCT    | GTCTCCTTATGTTGCCAGG     | AGTGCTACTCTGTCGCCA      | Different           |
| chr11 | 3961125   | 3961631   | DEL     | GAGAGCCTGGAGAGCAGTAG    | ATACAGGTATTGGCCGGGC     | GAGAGCCTGGAGAGCAGTAG    | ATACAGGTATTGGCCGGGC     | Same                |
| chr11 | 5852754   | 5862263   | DEL     | AATGCACATTGTTACCTGGGT   | GCTCTTGTGTGTGCAAAGTT    | AATGCACATTGTTACCTGGGT   | GCTCTTGTGTGTGCAAAGTT    | Same                |
| chr11 | 16974622  | 16975046  | DEL     | CCGATCAGCCAGCTTCCCTC    | TGTGTCTGATTGTGGTGGG     | CCGATCAGCCAGCTTCCCTC    | TGTGTCTGATTGTGGTGGG     | Same                |
| chr11 | 65364535  | 65371883  | DEL     | AGTGCTTACTACTGGCCAGG    | AGGTGGTGGAGGTTGAAGTG    | AGTGCTTACTACTGGCCAGG    | AGGTGGTGGAGGTTGAAGTG    | Same                |
| chr11 | 82145368  | 82152303  | DEL     | GCACGAAAGCCAGACATAGAT   | TGACCTGTTAGACTAGCCTTAGG | GCACGAAAGCCAGACATAGAT   | TGACCTGTTAGACTAGCCTTAGG | Same                |
| chr12 | 1754845   | 1755160   | DEL     | GGAAGTGGCAGAGGGAGGATA   | AGGAGGTTGAGATGGAGACC    | AGTCTCGTCTGTCAACCA      | AGGAGGTTGAGATGGAGACC    | Different           |
| chr12 | 2843755   | 2844200   | DEL     | GCCCATAGTCCCAGCTACT     | AGGTCTGTATGATTCCACCT    | GCCCATAGTCCCAGCTACT     | TCTCACTCTACCCACGCT      | Different           |
| chr12 | 9028261   | 9029325   | DEL     | AATGTTGTGATCTCGGCTCA    | AGCAGGCAATCTAGTGGGA     | AATGTTGTGATCTCGGCTCA    | AGCAGGCAATCTAGTGGGA     | Same                |
| chr12 | 15994723  | 15998587  | DEL     | GCGCATCTCTGCTCACTG      | GGGATGTAAGTTCAGCGGTCC   | GCGCATCTCTGCTCACTG      | GGGATGTAAGTTCAGCGGTCC   | Same                |
| chr12 | 60018564  | 60019727  | DEL     | GGGATGCAAGGCTGGTTCAA    | TCTGCTGTAGACACTCACAAC   | GGGATGCAAGGCTGGTTCAA    | TCTGCTGTAGACACTCACAAC   | Same                |
| chr12 | 64623682  | 64624699  | DEL     | TTCTTGCCAGTGTCTCTTAGG   | GCGCCTGTAGTTCACAGTA     | TTCTTGCCAGTGTCTCTTAGG   | GCGCCTGTAGTTCACAGTA     | Same                |
| chr12 | 95616677  | 95618638  | DEL     | ACAGTCAGAAGTGAAGGGAAT   | AGTAGATGTCAGAGGCCAGGTG  | AGTCTCACTCTGTCGCCCA     | AGTAGATGTCAGAGGCCAGGTG  | Different           |
| chr13 | 95368005  | 95372242  | DEL     | TGTGGATCATCAGGAGACCGT   | CATGAGGCGGAAGTGTGAGT    | TGTGGATCATCAGGAGACCGT   | CATGAGGCGGAAGTGTGAGT    | Same                |
| chr14 | 34044819  | 34045627  | DEL     | TTCTGTCAGGGAGCTTTGCG    | TGCCCGTAATCCCACCTACT    | TTCTGTCAGGGAGCTTTGCG    | TGCCCGTAATCCCACCTACT    | Same                |
| chr14 | 35136408  | 35145862  | DEL     | GGTGTGGGATGATGAGGGAA    | TCAATTAATGTACCACGGGCA   | GGTGTGGGATGATGAGGGAA    | TCAATTAATGTACCACGGGCA   | Same                |
| chr14 | 63257033  | 63258189  | DEL     | CGGGTCATGAGGTCAGAAAT    | TGGAACCTGTAGATGCTCAGC   | CGGGTCATGAGGTCAGAAAT    | AGTTTCACTCTGTTGCCAGG    | Different           |
| chr15 | 20376210  | 20384360  | DEL     | GCAGCCAACAGACACATGAA    | ACCATGTGCTTCCCAGTCTG    | GCAGCCAACAGACACATGAA    | ACCATGTGCTTCCCAGTCTG    | Same                |
| chr16 | 4201466   | 4201845   | DEL     | CCAGTTCAGTATTCTCGTACC   | CAGCCGACCTCCAACCTCTT    | CCAGTTCAGTATTCTCGTACC   | AAGCGGGCAGATCATGAG      | Different           |
| chr16 | 19934228  | 19956257  | DEL     | GAGCACATGACCTCCATTGG    | GCTTCCAGGTACACAGGTAGGT  | GAGCACATGACCTCCATTGG    | CTGCACCCATCAACCCATCAT   | Different           |
| chr16 | 76505236  | 76510128  | DEL     | ACCATATGACCCAGCAATCCC   | ACAACACTGATGAACCTCCTTG  | ACCATATGACCCAGCAATCCC   | ACAACACTGATGAACCTCCTTG  | Same                |
| chr16 | 85115881  | 85116469  | DEL     | TCCGGGATTCAAGTGATTCTCC  | GCAACTGTTCTCAAGTGGTTCA  | TCCGGGATTCAAGTGATTCTCC  | GCCTCATGCCTGTAATCCCAG   | Different           |
| chr17 | 820561    | 821700    | DEL     | ACACCTACTCAAGCGGCAGA    | TGGTGAAGAGACAGGGAAGGG   | AATTAGCTGGGCATGGTGGT    | TGGTGAAGAGACAGGGAAGGG   | Different           |
| chr17 | 20707724  | 20711252  | DEL     | GGAGGAGGCTTGCTAGAAA     | TCAGGGAGCTGAGGTATGAGA   | GGAGGAGGCTTGCTAGAAA     | TCAGGGAGCTGAGGTATGAGA   | Same                |
| chr17 | 35884154  | 35885055  | DEL     | CACCTCGCCAGCTAGATTT     | ATAGCCCATCAAGCCAAAC     | CACCTCGCCAGCTAGATTT     | ATAGCCCATCAAGCCAAAC     | Same                |
| chr17 | 54081302  | 54090640  | DEL     | TCCTACTCCATCCCTCCCTTT   | TGGTGTTTGAGTCATGAAGCCT  | TCCTACTCCATCCCTCCCTTT   | TGGTGTTTGAGTCATGAAGCCT  | Same                |
| chr18 | 47853242  | 47853436  | DEL     | GCGCAACTAGTCTGCTCAGTTC  | TTCCCTCTCAGAGCAGAGTCTT  | GCGCAACTAGTCTGCTCAGTTC  | AGTCTTGTCTGTGTCGCCA     | Different           |
| chr19 | 21453085  | 21455295  | DEL     | GTTTGTGGCATAATAACGCTTCA | GGGTTTCACTCGGTCTTCCA    | GTTTGTGGCATAATAACGCTTCA | GGGTTTCACTCGGTCTTCCA    | Same                |
| chr19 | 49548637  | 49548743  | DEL     | TCTCTGCCTCAGTCTCTCT     | TCTGCCCCATGATTTACGCA    | GTTTACCATGTTCCGCCAGG    | TCTGCCCCATGATTTACGCA    | Different           |
| chr19 | 50051484  | 50058115  | DEL     | GCTGCGTCTATTTCCTGTGG    | CTGCCATGTCCTTAGATCGT    | GTCTCGCTCTGTTGCCCA      | CTGCCATGTCCTTAGATCGT    | Different           |
| chr2  | 48624051  | 48630813  | DEL     | TGCCAACACTGGGTACTCC     | TGAACCCAGCAGCTCATCAA    | TGCCAACACTGGGTACTCC     | TGAACCCAGCAGCTCATCAA    | Same                |
| chr2  | 172139520 | 172142752 | DEL     | GCCTTAAGTGTTCAGTGAAGG   | AGGTGAAGGAAAGCAAGTTGGAG | GCCTTAAGTGTTCAGTGAAGG   | CGAGGTGGGTGAACCTCTGA    | Different           |
| chr2  | 193824777 | 193834041 | DEL     | TGAGTTCAGTGGATGGCAGGA   | AAAGCACTCCTCCGCAATGT    | TGAGTTCAGTGGATGGCAGGA   | AAAGCACTCCTCCGCAATGT    | Same                |
| chr2  | 227404174 | 227405319 | DEL     | ACAAAGATGAACACTGCTGCGA  | GCTCCTCCATCCCTGTAAGCA   | ACAAAGATGAACACTGCTGCGA  | CCTCCAGGGTTCAAGCAATTCT  | Different           |
| chr21 | 31544310  | 31544418  | DEL     | AGGTGGGCAGATCGTTCAAG    | GCAATGGCGTGATCTCAGCT    | CACGCCTGTAATCCCAGCA     | GCAATGGCGTGATCTCAGCT    | Different           |
| chr22 | 43984831  | 43986241  | DEL     | CGTTCGGTGTGTCATGTCGT    | CCTCTGACGGATGTTGCATGT   | CAAACCTCTGACCTCGTATCC   | CCTCTGACGGATGTTGCATGT   | Different           |
| chr3  | 9980228   | 9982164   | DEL     | TGGAGTCTGAAAGTCAAGGTC   | GGTATAGGCATACCCAGCGATA  | TGGAGTCTGAAAGTCAAGGTC   | TGGAATCTCACTCTGTCTCCA   | Different           |
| chr3  | 50305498  | 50310521  | DEL     | CCATCTGTCTGTCACTGCC     | GGGACACAAACACTGCGGAA    | CCGGTTCATGCCATTCTCC     | GGGACACAAACACTGCGGAA    | Different           |

|       |           |           |     |                          |                           |                          |                           |           |
|-------|-----------|-----------|-----|--------------------------|---------------------------|--------------------------|---------------------------|-----------|
| chr3  | 125217451 | 125218319 | DEL | CCAGGGAGGGATTGAGATAGTGA  | ACTCAAGGTCAAGGTGAAGCAC    | CCAGGGAGGGATTGAGATAGTGA  | ACTCAAGGTCAAGGTGAAGCAC    | Same      |
| chr3  | 136302171 | 136307357 | DEL | TGTAGCAACAGTGACCACCCA    | CACGCCTGGCCTGTCATATTA     | TGTAGCAACAGTGACCACCCA    | GCAATATCTCTCCCTCTCTCTCC   | Different |
| chr3  | 189374198 | 189382284 | DEL | GCCCTAAGAGACAAGTACCGG    | TCTGCGCTGGAGGATATGACA     | GCCCTAAGAGACAAGTACCGG    | TCTGCGCTGGAGGATATGACA     | Same      |
| chr3  | 195842345 | 195843061 | DEL | TCTTTGCAAGCACTGGGAAGT    | AGACGCCTGTTCCACCA         | TCTTTGCAAGCACTGGGAAGT    | CCACCATGCCCAGTCTGTTT      | Different |
| chr4  | 56673800  | 56678541  | DEL | ACCTCCACGACATCCTTCCA     | CCACTGTGCCTAACCAACAATA    | ACCTCCACGACATCCTTCCA     | CGAGACCAGCTTGACCAACAT     | Different |
| chr4  | 120165932 | 120166137 | DEL | CAAAATGCAATGAAGTAGTTGGCC | ATGCTCATGTCCTTTGTCCACT    | CAAAATGCAATGAAGTAGTTGGCC | ATGCTCATGTCCTTTGTCCACT    | Same      |
| chr5  | 2769309   | 2769526   | DEL | ATGGAGTGTCTCGGCTTACC     | AGCCTGTGGTATGCTACTGACC    | ATGGAGTGTCTCGGCTTACC     | AGCCTGTGGTATGCTACTGACC    | Same      |
| chr5  | 174703016 | 174705002 | DEL | GTCTCACTCCCATTGCACAGG    | GCCCAAGTAAACAGATCAATGCAC  | GTCTCACTCCCATTGCACAGG    | GCCCAAGTAAACAGATCAATGCAC  | Same      |
| chr6  | 103289589 | 103315014 | DEL | TCAGAGGTCAAGAGGGTTGAA    | TGGCAAAGGATATGAACAGACAC   | TCAGAGGTCAAGAGGGTTGAA    | TGGCAAAGGATATGAACAGACAC   | Same      |
| chr6  | 141227487 | 141228891 | DEL | CTGGAATGATGAACAATGCCCA   | CAACAATCAGGTGGCCAAATG     | CTGGAATGATGAACAATGCCCA   | CAACAATCAGGTGGCCAAATG     | Same      |
| chr7  | 51526615  | 51530992  | DEL | ACTAGACCACATCTCTCACCA    | ACCATCTCAGCCAGTTAGAA      | ACTAGACCACATCTCTCACCA    | ACCATCTCAGCCAGTTAGAA      | Same      |
| chr7  | 100729949 | 100743093 | DEL | GACTGCCACACATAAATTTCTTCT | GAGCAGAACCCTCTATGCTTGA    | GACTGCCACACATAAATTTCTTCT | GAGCAGAACCCTCTATGCTTGA    | Same      |
| chr7  | 109796632 | 109813844 | DEL | CGTACCTGAAAGTGACGGC      | ACCCAAAACCTCAGCTCTTTGT    | CGTACCTGAAAGTGACGGC      | ACCCAAAACCTCAGCTCTTTGT    | Same      |
| chr8  | 2921041   | 2921265   | DEL | GGTGCCTGGATTAAGAGGTCA    | AGGGTCTGGCTCTGTTGCT       | GGTGCCTGGATTAAGAGGTCA    | AGGGTCTGGCTCTGTTGCT       | Same      |
| chr8  | 74399197  | 74417845  | DEL | TGATGTGCTGCTGGATTTGGT    | GTCTCTCCACTTATCTAGGCCTTCT | TGATGTGCTGCTGGATTTGGT    | GTCTCTCCACTTATCTAGGCCTTCT | Same      |
| chr9  | 69189602  | 69190076  | DEL | TGCTGAGTGTGGTGGCATA      | AAAGACAGTGAGGGAGGTGG      | TGCTGAGTGTGGTGGCATA      | AAAGACAGTGAGGGAGGTGG      | Same      |
| chr9  | 111963571 | 111964556 | DEL | CGTGAGCAGTGATCGTACCA     | TGCCTCAGTTACCCAAGTAGC     | CGTGAGCAGTGATCGTACCA     | TGCCTCAGTTACCCAAGTAGC     | Same      |
| chr9  | 129264406 | 129265790 | DEL | ACAAGCACCCATCACCACAC     | GAGCAGCATAGTGAAAGCCCA     | ACAAGCACCCATCACCACAC     | TGGCACGCACCTGTAATCC       | Different |
| chr9  | 133307392 | 133315932 | DEL | TGTGCCGTGTGAGGTAGGAAA    | GAAACCAACCAGAGTGCAGCA     | TGTGCCGTGTGAGGTAGGAAA    | TAGGGTACATGGGCACAATGT     | Different |
| chrX  | 67903987  | 67910456  | DEL | GTGAAGACCCAAGCCACAAGA    | GAAAGGCCAGCAGTCAAACCT     | GTGAAGACCCAAGCCACAAGA    | GAAAGGCCAGCAGTCAAACCT     | Same      |
| chrX  | 73946227  | 73949977  | DEL | ACCCATCCCCTGATTGCATCTC   | AAATATCTGCAGGCCGGGTG      | AGTCTTGCTCTGTCAACCA      | AAATATCTGCAGGCCGGGTG      | Different |
| chrX  | 77865888  | 77868369  | DEL | GTGGAGAGAAAGCAGACAGGG    | CCACCTGCTCTGTCAATCATGA    | GTGGAGAGAAAGCAGACAGGG    | GTGGCTTGATCTCGGCTCAC      | Different |
| chr12 | 123425279 | 123429398 | DUP | AGTGATCCTCCCGCTTACAGG    | AAGACACACAATTCGGCCAGG     | AGTGATCCTCCCGCTTACAGG    | AAGACACACAATTCGGCCAGG     | Same      |
| chr16 | 23454899  | 23455636  | DUP | ATACAAGACTAGCCTGCCCAAC   | CATGCTATGGATTGGAACAGTC    | ATACAAGACTAGCCTGCCCAAC   | CATGCTATGGATTGGAACAGTC    | Same      |
| chr20 | 43696486  | 43696990  | DUP | GGGTTGAAGTGATTCTCTGCC    | CGGCAAATTCAGGAATGTTGGAG   | GGGTTGAAGTGATTCTCTGCC    | CGGCAAATTCAGGAATGTTGGAG   | Same      |
| chr20 | 50816137  | 50816736  | DUP | AGTTCTCACTCTGTCGCCCA     | GGGAAATAATTAGCGGTTGGCC    | AGTTCTCACTCTGTCGCCCA     | GGGAAATAATTAGCGGTTGGCC    | Same      |

**Supplementary Table 2. Primers used for PCR and Sanger sequencing.** Additional primers were designed for Sanger sequencing due to the presence of homopolymeric regions being present between the PCR primer and the breakpoint that could possibly cause premature polymerase slippage during sequencing.

| All SVs (70 Total TEMRs)                                              |                                   |                                |                                |                                 |  |                                 |     |       |        |       |      |     |
|-----------------------------------------------------------------------|-----------------------------------|--------------------------------|--------------------------------|---------------------------------|--|---------------------------------|-----|-------|--------|-------|------|-----|
| SV caller                                                             | # TEMRs identified by each caller | # of TEMRs with 0 bp deviation | # of TEMRs with 1 bp deviation | # of TEMRs with 2+ bp deviation |  | # of TEMRs with 2+ bp deviation | min | q1    | median | mean  | q3   | max |
| delly                                                                 | 68                                | 1                              | 54                             | 13                              |  | 13                              | 2   | 3     | 51     | 34.92 | 60   | 84  |
| lumpy                                                                 | 62                                | 9                              | 3                              | 50                              |  | 50                              | 2   | 6     | 35     | 34.32 | 49.8 | 89  |
| manta                                                                 | 67                                | 62                             | 0                              | 5                               |  | 5                               | 2   | 3     | 4      | 70.4  | 122  | 221 |
| pav (HiFi)                                                            | 70                                | 63                             | 3                              | 4                               |  | 4                               | 4   | 4     | 13     | 17.5  | 26.5 | 40  |
| pbsv (CLR)                                                            | 64                                | 47                             | 3                              | 14                              |  | 14                              | 2   | 3.25  | 12.5   | 22.93 | 34   | 90  |
| sniffles (CLR)                                                        | 70                                | 3                              | 6                              | 61                              |  | 61                              | 2   | 6     | 12     | 33.82 | 33   | 354 |
| svim (CLR)                                                            | 67                                | 4                              | 4                              | 59                              |  | 59                              | 2   | 4     | 12     | 29.27 | 37   | 358 |
| TEMRs with at least 1 bp junction homology (58 out of 70 Total TEMRs) |                                   |                                |                                |                                 |  |                                 |     |       |        |       |      |     |
| SV caller                                                             | # SVs identified by each caller   | # of SVs with 0 bp deviation   | # of SVs with 1 bp deviation   | # of SVs with 2+ bp deviation   |  | # of TEMRs with 2+ bp deviation | min | q1    | median | mean  | q3   | max |
| delly                                                                 | 56                                | 0                              | 48                             | 8                               |  | 8                               | 2   | 51.75 | 59.5   | 55    | 65.5 | 84  |
| lumpy                                                                 | 50                                | 0                              | 2                              | 48                              |  | 48                              | 2   | 6     | 36     | 35.44 | 50.3 | 89  |
| manta                                                                 | 55                                | 51                             | 0                              | 4                               |  | 4                               | 3   | 3.75  | 63     | 87.5  | 147  | 221 |
| pav (HiFi)                                                            | 58                                | 57                             | 0                              | 1                               |  | 1                               | 40  | 40    | 40     | 40    | 40   | 40  |
| pbsv (CLR)                                                            | 53                                | 42                             | 1                              | 10                              |  | 10                              | 2   | 4.25  | 21     | 28.7  | 40.8 | 90  |
| sniffles (CLR)                                                        | 58                                | 0                              | 3                              | 55                              |  | 55                              | 2   | 6.5   | 12     | 36.45 | 35   | 354 |
| svim (CLR)                                                            | 56                                | 2                              | 3                              | 51                              |  | 51                              | 2   | 4     | 19     | 32.65 | 39.5 | 358 |
| TEMRs with no junction homology (12 out of 70 Total TEMRs)            |                                   |                                |                                |                                 |  |                                 |     |       |        |       |      |     |
| SV caller                                                             | # TEMRs identified by each caller | # of TEMRs with 0 bp deviation | # of TEMRs with 1 bp deviation | # of TEMRs with 2+ bp deviation |  | # of TEMRs with 2+ bp deviation | min | q1    | median | mean  | q3   | max |
| delly                                                                 | 12                                | 1                              | 6                              | 5                               |  | 5                               | 2   | 2     | 3      | 2.8   | 3    | 4   |
| lumpy                                                                 | 12                                | 9                              | 1                              | 2                               |  | 2                               | 2   | 4.75  | 7.5    | 7.5   | 10.3 | 13  |
| manta                                                                 | 12                                | 11                             | 0                              | 1                               |  | 1                               | 2   | 2     | 2      | 2     | 2    | 2   |
| pav (HiFi)                                                            | 12                                | 6                              | 3                              | 3                               |  | 3                               | 4   | 4     | 4      | 10    | 13   | 22  |
| pbsv (CLR)                                                            | 11                                | 5                              | 2                              | 4                               |  | 4                               | 2   | 3.5   | 4.5    | 8.5   | 9.5  | 23  |
| sniffles (CLR)                                                        | 12                                | 3                              | 3                              | 6                               |  | 6                               | 2   | 5     | 5.5    | 9.67  | 8.25 | 31  |
| svim (CLR)                                                            | 11                                | 2                              | 1                              | 8                               |  | 8                               | 3   | 4.75  | 5.5    | 7.75  | 9    | 21  |

**Supplementary Table 3. Assessment of breakpoint accuracy between manual reconstruction and SV callers.** A total of 70 TEMRs were validated using PCR and Sanger sequencing and their corresponding breakpoints were manually reconstructed. We compared the breakpoint accuracy of all seven callers used in this study and additional metrics were calculated for events with more than 2bp deviation from the manually reconstructed junctions.

| <b>Alu elements</b> |               | <b>LINE-1 elements</b> |         |
|---------------------|---------------|------------------------|---------|
| <i>AluY</i>         | <i>AluSc</i>  | L1HS                   | L1M1    |
| <i>AluYa5</i>       | <i>AluSc5</i> | L1PA2                  | L1M2    |
| <i>AluYb8</i>       | <i>AluSc8</i> | L1PA3                  | L1M4a1  |
| <i>AluYc</i>        | <i>AluSg</i>  | L1PA4                  | L1M4c   |
| <i>AluYe5</i>       | <i>AluSg4</i> | L1PA5                  | L1M5    |
| <i>AluYf1</i>       | <i>AluSg7</i> | L1PA6                  | L1MA1   |
| <i>AluYg6</i>       | <i>AluSp</i>  | L1PA7                  | L1MA2   |
| <i>AluYh3</i>       | <i>AluSq</i>  | L1PA8                  | L1MA3   |
| <i>AluYh3a3</i>     | <i>AluSq2</i> | L1PA11                 | L1MA4   |
| <i>AluYj4</i>       | <i>AluSq4</i> | L1PA13                 | L1MB5   |
| <i>AluYk2</i>       | <i>AluSx</i>  | L1PA14                 | L1MB7   |
| <i>AluYk3</i>       | <i>AluSx1</i> | L1PA15                 | L1MB8   |
| <i>AluYm1</i>       | <i>AluSx3</i> | L1PA16                 | L1MC1   |
|                     | <i>AluSx4</i> | L1PA17                 | L1MC4   |
|                     | <i>AluSz</i>  | L1PB1                  | L1MC4a  |
|                     | <i>AluSz6</i> | L1PB2                  | L1MCa   |
|                     | <i>AluJb</i>  | L1PB3                  | L1MCc   |
|                     | <i>AluJo</i>  | L1PB4                  | L1MD    |
|                     | <i>AluJr</i>  | L1PBa                  | L1MD1   |
|                     | <i>AluJr4</i> | L1PREC2                | L1MDa   |
|                     | <i>Alu</i>    | L1P1                   | L1ME1   |
|                     | FAM           | L1P2                   | L1ME2   |
|                     | FLAM_C        | L1P4                   | L1ME2z  |
|                     |               |                        | L1ME3Cz |
|                     |               |                        | L1ME3G  |
|                     |               |                        | L1ME4a  |
|                     |               |                        | L1MEc   |
|                     |               |                        | L1MEd   |
|                     |               |                        | L1MEf   |
|                     |               |                        | HAL1    |
|                     |               |                        | HAL1ME  |

**Supplementary Table 4. List of 36 *Alu* and 54 LINE-1 elements involved in 493 TEMRs.**

| TE family              | subfamily   | Count (this study) | Percentage (this study) | Count (GRCh38) | Percentage (GRCh38) | p-value               |
|------------------------|-------------|--------------------|-------------------------|----------------|---------------------|-----------------------|
| <i>Alu</i>             | <i>AluY</i> | 195                | 24.6                    | 139234         | 11.8                | 2.341e <sup>-23</sup> |
|                        | <i>AluS</i> | 530                | 66.8                    | 678131         | 57.4                | 8.158e <sup>-8</sup>  |
|                        | <i>AluJ</i> | 64                 | 8.1                     | 309536         | 26.2                |                       |
|                        | Others      | 5                  | 0.6                     | 54171          | 4.6                 |                       |
| (397 <i>Alu</i> TEMRs) | Total       | 794                |                         | 1181072        |                     |                       |
|                        |             |                    |                         |                |                     |                       |
| LINE-1                 | L1HS        | 4                  | 2.1                     | 1620           | 0.2                 | 0.00034               |
|                        | L1PA        | 103                | 53.6                    | 121006         | 12.6                | 2.946e <sup>-42</sup> |
|                        | L1M         | 60                 | 31.3                    | 747338         | 77.7                |                       |
|                        | Others      | 25                 | 13                      | 92121          | 9.6                 |                       |
| (96 LINE-1 TEMRs)      | Total       | 192                |                         | 962085         |                     |                       |

**Supplementary Table 5. Count of *Alu* and LINE-1 subfamilies involved in 493 TEMRs.** Two-tailed Fisher's exact *t*-test was used to calculate the p-value.



| TE type    | SV type     | Mechanism | Percent similarity (median) |
|------------|-------------|-----------|-----------------------------|
| <i>Alu</i> | Deletion    | HR        | 82.3                        |
|            |             | NHE       | 80.6                        |
|            | Duplication | HR        | 81.5                        |
|            |             | NHE       | 79.5                        |
|            | Inversion   | HR        | 81.7                        |
| LINE-1     | Deletion    | HR        | 93.5                        |
|            |             | NHE       | 47.9                        |
|            | Duplication | HR        | 88.4                        |
|            |             | NHE       | 60.2                        |
|            | Inversion   | HR        | 97.1                        |

**Supplementary Table 6. Median percent similarity between different TEs, SV types, and mechanisms.**

| Mechanism | TE         | Orientation | Feature_1      | Feature_2      | r-value (spearman) | p-value (spearman) |
|-----------|------------|-------------|----------------|----------------|--------------------|--------------------|
| HR        | <i>Alu</i> | SAME        | HOMLEN         | PCT_SIMILARITY | 0.1932             | 0.00026            |
|           |            |             | HOMLEN         | SV_LENGTH      | 0.08868            | 0.09573            |
|           |            |             | PCT_SIMILARITY | SV_LENGTH      | 0.12577            | 0.01791            |
| HR        | LINE-1     | SAME        | HOMLEN         | PCT_SIMILARITY | 0.49028            | 0.0024             |
|           |            |             | HOMLEN         | SV_LENGTH      | -0.26838           | 0.1135             |
|           |            |             | PCT_SIMILARITY | SV_LENGTH      | -0.24659           | 0.14711            |
| NHE       | <i>Alu</i> | SAME        | HOMLEN         | PCT_SIMILARITY | -0.34638           | 0.1143             |
|           |            |             | HOMLEN         | SV_LENGTH      | 0.11569            | 0.60818            |
|           |            |             | PCT_SIMILARITY | SV_LENGTH      | 0.05251            | 0.81647            |
| NHE       | <i>Alu</i> | OPP         | HOMLEN         | PCT_SIMILARITY | 0.23634            | 0.36111            |
|           |            |             | HOMLEN         | SV_LENGTH      | 0.11883            | 0.64966            |
|           |            |             | PCT_SIMILARITY | SV_LENGTH      | -0.2451            | 0.34305            |
| NHE       | LINE-1     | SAME        | HOMLEN         | PCT_SIMILARITY | 0.02663            | 0.88114            |
|           |            |             | HOMLEN         | SV_LENGTH      | 0.13095            | 0.4604             |
|           |            |             | PCT_SIMILARITY | SV_LENGTH      | 0.29015            | 0.096              |
| NHE       | LINE-1     | OPP         | HOMLEN         | PCT_SIMILARITY | 0.02352            | 0.90922            |
|           |            |             | HOMLEN         | SV_LENGTH      | 0.1013             | 0.62244            |
|           |            |             | PCT_SIMILARITY | SV_LENGTH      | -0.32923           | 0.10052            |

**Supplementary Table 7. Summary of the correlation analysis.** Correlation analysis (two-tailed Spearman) within different categories based on mechanism (HR/NHE), TE type (*Alu*/LINE-1), and orientation (same/opposite). HOMLEN: homology length; PCT\_SIMILARITY: percent similarity (calculated using swalign); SV\_LENGTH: length of TEMR.

| TEMRs overlapping           |                              |                       |                           | non-TEMRs overlapping<br>(including polymorphic MEI) |                              |                       |                           | non-TEMRs overlapping<br>(excluding polymorphic MEI) |                              |                       |                           |
|-----------------------------|------------------------------|-----------------------|---------------------------|------------------------------------------------------|------------------------------|-----------------------|---------------------------|------------------------------------------------------|------------------------------|-----------------------|---------------------------|
| <b>All genes</b>            |                              |                       |                           |                                                      |                              |                       |                           |                                                      |                              |                       |                           |
| Overlap status              | RefSeq (curated + predicted) | RefSeq (curated only) | % of curated Refseq genes | Overlap status                                       | RefSeq (curated + predicted) | RefSeq (curated only) | % of curated Refseq genes | Overlap status                                       | RefSeq (curated + predicted) | RefSeq (curated only) | % of curated Refseq genes |
| exonic                      | 28                           | 21                    | 75                        | exonic                                               | 182                          | 148                   | 81.3                      | exonic                                               | 146                          | 121                   | 82.9                      |
| intronic                    | 241                          | 221                   | 91.7                      | intronic                                             | 2244                         | 1885                  | 84                        | intronic                                             | 1021                         | 860                   | 84.2                      |
| proximal                    | 52                           | 40                    | 76.9                      | proximal                                             | 314                          | 226                   | 72                        | proximal                                             | 169                          | 132                   | 78.1                      |
| <b>Total</b>                | <b>321</b>                   | <b>282</b>            | <b>87.9</b>               | <b>Total</b>                                         | <b>2740</b>                  | <b>2259</b>           | <b>82.4</b>               | <b>Total</b>                                         | <b>1336</b>                  | <b>1113</b>           | <b>83.3</b>               |
| <b>Protein coding genes</b> |                              |                       |                           |                                                      |                              |                       |                           |                                                      |                              |                       |                           |
| Overlap status              | RefSeq (curated + predicted) | RefSeq (curated only) | % of curated Refseq genes | Overlap status                                       | RefSeq (curated + predicted) | RefSeq (curated only) | % of curated Refseq genes | Overlap status                                       | RefSeq (curated + predicted) | RefSeq (curated only) | % of curated Refseq genes |
| exonic                      | 20                           | 19                    | 95                        | exonic                                               | 119                          | 112                   | 94.1                      | exonic                                               | 95                           | 89                    | 93.7                      |
| intronic                    | 212                          | 204                   | 96.2                      | intronic                                             | 1690                         | 1632                  | 96.6                      | intronic                                             | 775                          | 747                   | 96.4                      |
| proximal                    | 37                           | 33                    | 89.2                      | proximal                                             | 171                          | 165                   | 96.5                      | proximal                                             | 96                           | 92                    | 95.8                      |
| <b>Total</b>                | <b>269</b>                   | <b>256</b>            | <b>95.2</b>               | <b>Total</b>                                         | <b>1980</b>                  | <b>1909</b>           | <b>96.4</b>               | <b>Total</b>                                         | <b>966</b>                   | <b>928</b>            | <b>96.1</b>               |

**Supplementary Table 8. Total count of Exonic, intronic and proximal SVs.** We used the RefSeq dataset from NCBI and calculated the percentage of TEMRs overlapping only the curated gene set.

| Category        | Name                      | Version               | Settings used               | URL                                                                                                                                                                 |
|-----------------|---------------------------|-----------------------|-----------------------------|---------------------------------------------------------------------------------------------------------------------------------------------------------------------|
| Illumina WGS    | BWA-MEM                   | 0.7.17                | default                     | <a href="https://github.com/lh3/bwa">https://github.com/lh3/bwa</a>                                                                                                 |
|                 | Manta                     | 1.3.2                 | high sensitivity calling    | <a href="https://github.com/Illumina/manta">https://github.com/Illumina/manta</a>                                                                                   |
|                 | LUMPY                     | 0.2.13                | default                     | <a href="https://github.com/arq5x/lumpy-sv">https://github.com/arq5x/lumpy-sv</a>                                                                                   |
|                 | DELLY                     | 0.7.8                 | default                     | <a href="https://github.com/dellytools/delly">https://github.com/dellytools/delly</a>                                                                               |
|                 | Duphold                   | 0.2.1                 | default                     | <a href="https://github.com/brentp/duphold">https://github.com/brentp/duphold</a>                                                                                   |
|                 | mosdepth                  | 0.3.2                 | default                     | <a href="https://github.com/brentp/mosdepth">https://github.com/brentp/mosdepth</a>                                                                                 |
| PacBio WGS      | pbh5tools                 | 0.8.0                 | default                     | <a href="https://github.com/PacificBiosciences/pbh5tools">https://github.com/PacificBiosciences/pbh5tools</a>                                                       |
|                 | NGMLR                     | 0.2.6                 | default                     | <a href="https://github.com/philres/ngmlr">https://github.com/philres/ngmlr</a>                                                                                     |
|                 | Sniffles                  | 1.0.7                 | default with -s 5           | <a href="https://github.com/fritzsedlazeck/Sniffles">https://github.com/fritzsedlazeck/Sniffles</a>                                                                 |
|                 | pbsv                      | 2.2.0                 | default                     | <a href="https://github.com/pacificbiosciences/pbsv/">https://github.com/pacificbiosciences/pbsv/</a>                                                               |
|                 | SVIM                      | 1.4.0                 | default                     | <a href="https://github.com/eldariont/svim">https://github.com/eldariont/svim</a>                                                                                   |
|                 | pav                       | 1.1.0                 | default                     | <a href="https://github.com/EichlerLab/pav">https://github.com/EichlerLab/pav</a>                                                                                   |
| General         | BioConda                  |                       |                             | <a href="https://bioconda.github.io/index.html">https://bioconda.github.io/index.html</a>                                                                           |
|                 | samtools                  | 1.7                   |                             | <a href="https://github.com/samtools/samtools">https://github.com/samtools/samtools</a>                                                                             |
|                 | bcftools                  | 1.9                   |                             | <a href="https://github.com/samtools/bcftools">https://github.com/samtools/bcftools</a>                                                                             |
|                 | bedtools                  | 2.27.1                |                             | <a href="https://github.com/arq5x/bedtools2">https://github.com/arq5x/bedtools2</a>                                                                                 |
|                 | swalign                   | 0.3.4                 |                             | <a href="https://github.com/mbreese/swalign">https://github.com/mbreese/swalign</a>                                                                                 |
|                 | Ensembl Variant Predictor | Effect<br>release 106 | Refseq database transcripts | <a href="https://useast.ensembl.org/info/docs/tools/vep/index.html">https://useast.ensembl.org/info/docs/tools/vep/index.html</a>                                   |
| Raw data        | 1000GP                    |                       |                             | <a href="https://www.internationalgenome.org/data">https://www.internationalgenome.org/data</a>                                                                     |
| Python packages | pandas                    | 1.0.5                 |                             | <a href="https://github.com/pandas-dev/pandas">https://github.com/pandas-dev/pandas</a>                                                                             |
|                 | scipy                     | 1.5.0                 |                             | <a href="https://github.com/scipy/scipy">https://github.com/scipy/scipy</a>                                                                                         |
|                 | numpy                     | 1.19.1                |                             | <a href="https://github.com/numpy/numpy">https://github.com/numpy/numpy</a>                                                                                         |
|                 | biopython                 | 1.78                  |                             | <a href="https://github.com/biopython/biopython">https://github.com/biopython/biopython</a>                                                                         |
| Plots (python)  | matplotlib                | 3.2.2                 |                             | <a href="https://github.com/matplotlib/matplotlib">https://github.com/matplotlib/matplotlib</a>                                                                     |
|                 | seaborn                   | 0.11.0                |                             | <a href="https://github.com/mwaskom/seaborn">https://github.com/mwaskom/seaborn</a>                                                                                 |
|                 | PyWaffle                  | 0.6.1                 |                             | <a href="https://github.com/gylii/PyWaffle">https://github.com/gylii/PyWaffle</a>                                                                                   |
|                 | matplotlib-venn           | 0.11.5                |                             | <a href="https://github.com/konstantint/matplotlib-venn">https://github.com/konstantint/matplotlib-venn</a>                                                         |
|                 | brokenaxes                | 0.4.2                 |                             | <a href="https://github.com/bendichter/brokenaxes">https://github.com/bendichter/brokenaxes</a>                                                                     |
|                 | upsetplot                 | 0.6.0                 |                             | <a href="https://github.com/jnothman/UpSetPlot">https://github.com/jnothman/UpSetPlot</a>                                                                           |
| Plots (R)       | RIdeogram                 | 0.2.2                 |                             | <a href="https://cran.r-project.org/web/packages/RIdeogram/vignettes/RIdeogram.html">https://cran.r-project.org/web/packages/RIdeogram/vignettes/RIdeogram.html</a> |

**Supplementary Table 9. Tools and packages.**

| TEMR                    | Copy Number status | Restriction enzyme | Forward Primer         | Probe                        | Reverse Primer       |
|-------------------------|--------------------|--------------------|------------------------|------------------------------|----------------------|
| chr17:43359210-43365251 | Gain               | AluI               | AGTCCTCTAGATGGGAGGTG   | TCACATGTACATCGGCCTGGTGT      | TGAGGAACAGTTTCTGGTGG |
| chr17:43359210-43365251 | Loss               | AluI               | CGTGTAACGCAACACACAA    | CGGTCCCAACTGATGCAAATGGC      | GTCGCTACGGGAGATTGTC  |
| chr16:81765053-81765596 | Gain               | HaeIII             | TTGGACACAGAGACATGCAC   | GCAACACAGCGACACACAGGG        | TCAGTTGTCACATGGTGCTC |
| chr16:3632625-3634268   | Gain               | AluI               | TCTTTGCCCTTGAGTTTGGT   | TCCACTTTCACCTGATGCTATACCACTT | GAGGGAACCTGTACAACCCA |
| chr14:21581819-21590876 | Gain               | AluI               | CCTGACCTCAGGTAGTCTGT   | GGCCTCCCAAAGTGCTGGGA         | GCATTAAAGACAAGGCAGGC |
| <b>Reference gene</b>   |                    |                    |                        |                              |                      |
| RPP30                   | Neutral            | None               | CCCCTGAGAGATGTTTAGTAAG | ACAGTGAGGTAGTTCCATGAATCATGCT | ACAGAACACTCACATCCAAA |

**Supplementary Table 10. Restriction enzymes, primers and probes used for ddPCR.**

### Supplementary References

1. Ebert, P. *et al.* Haplotype-resolved diverse human genomes and integrated analysis of structural variation. *Science* **372**(2021).
2. Sen, S.K. *et al.* Human genomic deletions mediated by recombination between Alu elements. *Am J Hum Genet* **79**, 41-53 (2006).
3. Han, K. *et al.* L1 recombination-associated deletions generate human genomic variation. *Proc Natl Acad Sci U S A* **105**, 19366-71 (2008).
