# Supplementary material for: Transposable element-mediated rearrangements are prevalent in human genomes
Source: PubMed Central journal article supplement (PMC9675761; doi:10.1038/s41467-022-34810-8), 2022-11-19
Supplement: 41467_2022_34810_MOESM3_ESM.pdf [file 41467_2022_34810_MOESM3_ESM.pdf]

**Supplementary Data 1**

List of 445 TE-mediated deletions

**Supplementary Data 2**

List of 33 TE-mediated duplications

**Supplementary Data 3**

List of 15 TE-mediated inversions
