# Supplementary material for: Transposable element-mediated rearrangements are prevalent in human genomes
Source: PubMed Central journal article supplement (PMC9675761; doi:10.1038/s41467-022-34810-8), 2022-11-19
Supplement: 41467_2022_34810_MOESM5_ESM.pdf [file 41467_2022_34810_MOESM5_ESM.pdf]

## Reporting Summary

Nature Portfolio wishes to improve the reproducibility of the work that we publish. This form provides structure for consistency and transparency in reporting. For further information on Nature Portfolio policies, see our [Editorial Policies](#) and the [Editorial Policy Checklist](#).

### Statistics

For all statistical analyses, confirm that the following items are present in the figure legend, table legend, main text, or Methods section.

- |                                     |                                                                                                                                                                                                                                                                                                |
|-------------------------------------|------------------------------------------------------------------------------------------------------------------------------------------------------------------------------------------------------------------------------------------------------------------------------------------------|
| n/a                                 | Confirmed                                                                                                                                                                                                                                                                                      |
| <input type="checkbox"/>            | <input checked="" type="checkbox"/> The exact sample size ( $n$ ) for each experimental group/condition, given as a discrete number and unit of measurement                                                                                                                                    |
| <input type="checkbox"/>            | <input checked="" type="checkbox"/> A statement on whether measurements were taken from distinct samples or whether the same sample was measured repeatedly                                                                                                                                    |
| <input type="checkbox"/>            | <input checked="" type="checkbox"/> The statistical test(s) used AND whether they are one- or two-sided<br><i>Only common tests should be described solely by name; describe more complex techniques in the Methods section.</i>                                                               |
| <input checked="" type="checkbox"/> | <input type="checkbox"/> A description of all covariates tested                                                                                                                                                                                                                                |
| <input checked="" type="checkbox"/> | <input type="checkbox"/> A description of any assumptions or corrections, such as tests of normality and adjustment for multiple comparisons                                                                                                                                                   |
| <input type="checkbox"/>            | <input checked="" type="checkbox"/> A full description of the statistical parameters including central tendency (e.g. means) or other basic estimates (e.g. regression coefficient) AND variation (e.g. standard deviation) or associated estimates of uncertainty (e.g. confidence intervals) |
| <input type="checkbox"/>            | <input checked="" type="checkbox"/> For null hypothesis testing, the test statistic (e.g. $F$ , $t$ , $r$ ) with confidence intervals, effect sizes, degrees of freedom and $P$ value noted<br><i>Give <math>P</math> values as exact values whenever suitable.</i>                            |
| <input checked="" type="checkbox"/> | <input type="checkbox"/> For Bayesian analysis, information on the choice of priors and Markov chain Monte Carlo settings                                                                                                                                                                      |
| <input checked="" type="checkbox"/> | <input type="checkbox"/> For hierarchical and complex designs, identification of the appropriate level for tests and full reporting of outcomes                                                                                                                                                |
| <input checked="" type="checkbox"/> | <input type="checkbox"/> Estimates of effect sizes (e.g. Cohen's $d$ , Pearson's $r$ ), indicating how they were calculated                                                                                                                                                                    |

*Our web collection on [statistics for biologists](#) contains articles on many of the points above.*

### Software and code

Policy information about [availability of computer code](#)

|                 |                                                                                                                                                                                                                                                                                                                                                                                                                                                                                                                                                                                                                                                                                |
|-----------------|--------------------------------------------------------------------------------------------------------------------------------------------------------------------------------------------------------------------------------------------------------------------------------------------------------------------------------------------------------------------------------------------------------------------------------------------------------------------------------------------------------------------------------------------------------------------------------------------------------------------------------------------------------------------------------|
| Data collection | No new sequencing data was generated in this study.                                                                                                                                                                                                                                                                                                                                                                                                                                                                                                                                                                                                                            |
| Data analysis   | <p>Tools and packages used for analysis in this study</p> <p>short-read sequencing: BWA-MEM(0.7.17), Manta(1.3.2), LUMPY(0.2.13), DELLY(0.7.8), Duphold(0.2.1), mosdepth(0.3.2)</p> <p>long-read sequencing: pbh5tools(0.8.0), NGMLR(0.2.6), Sniffles(1.0.7), pbsv(2.2.0), SVIM(1.4.0), pav(1.1.0)</p> <p>Python packages: pandas(1.0.5), scipy(1.5.0), numpy(1.19.1), biopython(1.78), matplotlib(3.2.2), seaborn(0.11.0), PyWaffle(0.6.1), matplotlib-venn(0.11.5), brokenaxes(0.4.2), upsetplot(0.6.0)</p> <p>R packages: RIdeogram(0.2.2)</p> <p>Others: samtools(1.7), bcftools(1.9), bedtools(2.27.1), swalign(0.3.4), Ensembl Variant Effect Predictor(release 106)</p> |

For manuscripts utilizing custom algorithms or software that are central to the research but not yet described in published literature, software must be made available to editors and reviewers. We strongly encourage code deposition in a community repository (e.g. GitHub). See the Nature Portfolio [guidelines for submitting code & software](#) for further information.

## Data

Policy information about [availability of data](#)

All manuscripts must include a [data availability statement](#). This statement should provide the following information, where applicable:

- Accession codes, unique identifiers, or web links for publicly available datasets
- A description of any restrictions on data availability
- For clinical datasets or third party data, please ensure that the statement adheres to our [policy](#)

All raw sequencing data used in this study were downloaded from publicly available databases.

1. All sequencing data used in this study were directly downloaded from publicly available database at International Genome Sample Resource (IGSR) at <https://www.internationalgenome.org/data-portal/data-collection/structural-variation> (Chaisson et al. 2019); <https://www.internationalgenome.org/data-portal/data-collection/hgsvc2> (Ebert et al. 2021).
2. The human reference genome GRCh38/hg38 was downloaded from UCSC Genome Browser at <https://hgdownload.soe.ucsc.edu/goldenPath/hg38/chromosomes/>.
3. NCBI Refseq dataset was downloaded from <https://www.ncbi.nlm.nih.gov/projects/genome/guide/human/index.shtml>.
4. L1 recombination associated deletion (Han et al. 2008) data was download from [https://biosci-batzerlab.biology.lsu.edu/supplementary\\_data/Han\\_et\\_al\\_L1RAD\\_SI\\_Table\\_S4.doc](https://biosci-batzerlab.biology.lsu.edu/supplementary_data/Han_et_al_L1RAD_SI_Table_S4.doc).
5. Alu recombination-mediation deletion (Sen et al. 2006) data was downloaded from [https://biosci-batzerlab.biology.lsu.edu/supplementary\\_data/Sen\\_et\\_al\\_Suppl\\_Data.zip](https://biosci-batzerlab.biology.lsu.edu/supplementary_data/Sen_et_al_Suppl_Data.zip).
6. SV and TEMR files have been deposited in Zenodo with the following accession code: 10.5281/zenodo.7272154. Pipeline used in this study can be found at [https://github.com/parithi-b/TEMR\\_analysis\\_pipeline](https://github.com/parithi-b/TEMR_analysis_pipeline)
7. Primers used for PCR, Sanger and ddPCR experiments can be found in the supplementary table.
8. All other data used for analysis and figures are available within supplementary information and supplementary data.

## Human research participants

Policy information about [studies involving human research participants and Sex and Gender in Research](#).

|                             |                                  |
|-----------------------------|----------------------------------|
| Reporting on sex and gender | <input type="text" value="N/A"/> |
| Population characteristics  | <input type="text" value="N/A"/> |
| Recruitment                 | <input type="text" value="N/A"/> |
| Ethics oversight            | <input type="text" value="N/A"/> |

Note that full information on the approval of the study protocol must also be provided in the manuscript.

## Field-specific reporting

Please select the one below that is the best fit for your research. If you are not sure, read the appropriate sections before making your selection.

- Life sciences       Behavioural & social sciences       Ecological, evolutionary & environmental sciences

For a reference copy of the document with all sections, see [nature.com/documents/nr-reporting-summary-flat.pdf](https://nature.com/documents/nr-reporting-summary-flat.pdf)

## Life sciences study design

All studies must disclose on these points even when the disclosure is negative.

|                 |                                                                                                                                                                                                                                                                                                                                                                                                                                                                                                                                                                             |
|-----------------|-----------------------------------------------------------------------------------------------------------------------------------------------------------------------------------------------------------------------------------------------------------------------------------------------------------------------------------------------------------------------------------------------------------------------------------------------------------------------------------------------------------------------------------------------------------------------------|
| Sample size     | Three well-characterized genomes representative of: (1) population admixture, Puerto Rican HG00733 (PUR); (2) low diversity, Southern Han Chinese HG00514 (CHS); and (3) high diversity, Yoruban NA19240 (YRI) were used in this study. Additionally, these three individuals have been studied as a part of the 1000GP phase 3, HGSVC phase 1, and HGSVC phase 2 studies, which provides us with extensive genomic data ranging from short-read sequencing to long-read sequencing, Bionano genomics data and RNA-Seq that can be used for further understanding of TEMRs. |
| Data exclusions | No data were excluded.                                                                                                                                                                                                                                                                                                                                                                                                                                                                                                                                                      |
| Replication     | All sequencing data can be downloaded from IGSR. The sequence analyses can be replicated using the analysis flow that has been posted on github.                                                                                                                                                                                                                                                                                                                                                                                                                            |
| Randomization   | Samples were randomly selected from the population.                                                                                                                                                                                                                                                                                                                                                                                                                                                                                                                         |
| Blinding        | All samples were analyzed by the same pipeline.                                                                                                                                                                                                                                                                                                                                                                                                                                                                                                                             |

## Reporting for specific materials, systems and methods

We require information from authors about some types of materials, experimental systems and methods used in many studies. Here, indicate whether each material, system or method listed is relevant to your study. If you are not sure if a list item applies to your research, read the appropriate section before selecting a response.

### Materials & experimental systems

|                                     |                                                           |
|-------------------------------------|-----------------------------------------------------------|
| n/a                                 | Involved in the study                                     |
| <input checked="" type="checkbox"/> | <input type="checkbox"/> Antibodies                       |
| <input type="checkbox"/>            | <input checked="" type="checkbox"/> Eukaryotic cell lines |
| <input checked="" type="checkbox"/> | <input type="checkbox"/> Palaeontology and archaeology    |
| <input checked="" type="checkbox"/> | <input type="checkbox"/> Animals and other organisms      |
| <input checked="" type="checkbox"/> | <input type="checkbox"/> Clinical data                    |
| <input checked="" type="checkbox"/> | <input type="checkbox"/> Dual use research of concern     |

### Methods

|                                     |                                                 |
|-------------------------------------|-------------------------------------------------|
| n/a                                 | Involved in the study                           |
| <input checked="" type="checkbox"/> | <input type="checkbox"/> ChIP-seq               |
| <input checked="" type="checkbox"/> | <input type="checkbox"/> Flow cytometry         |
| <input checked="" type="checkbox"/> | <input type="checkbox"/> MRI-based neuroimaging |

## Eukaryotic cell lines

Policy information about [cell lines and Sex and Gender in Research](#)

|                                                                      |                                                                                                                                                                                                       |
|----------------------------------------------------------------------|-------------------------------------------------------------------------------------------------------------------------------------------------------------------------------------------------------|
| Cell line source(s)                                                  | All cell lines (HG00512, HG00513, HG00514, HG00731, HG00732, HG00733, NA19239, NA19238, NA19240) used for PCR, Sanger and ddPCR experiments in this study can be obtained from Coriell Biorepository. |
| Authentication                                                       | SVs obtained from the sequencing data and validated by Sanger sequencing were compared with previously published data and used to authenticate each cell line.                                        |
| Mycoplasma contamination                                             | All cell lines used in this study tested negative for mycoplasma presence                                                                                                                             |
| Commonly misidentified lines<br>(See <a href="#">ICLAC</a> register) | N/A                                                                                                                                                                                                   |
